# Supplementary material for: A Bibliometric Analysis of Microalgae Research in the World, Europe, and the European Atlantic Area
Source: MDPI journal article supplement (doi:10.3390/md18020079), 2020-01-26
Supplement: s1 [file s1]

d.

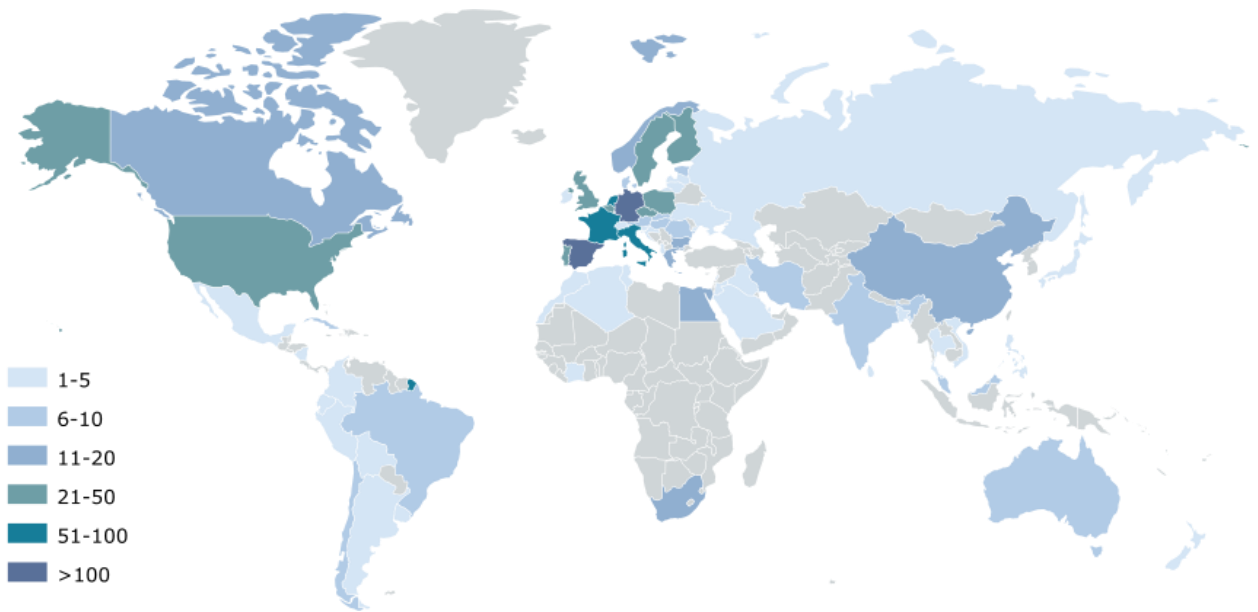

e.

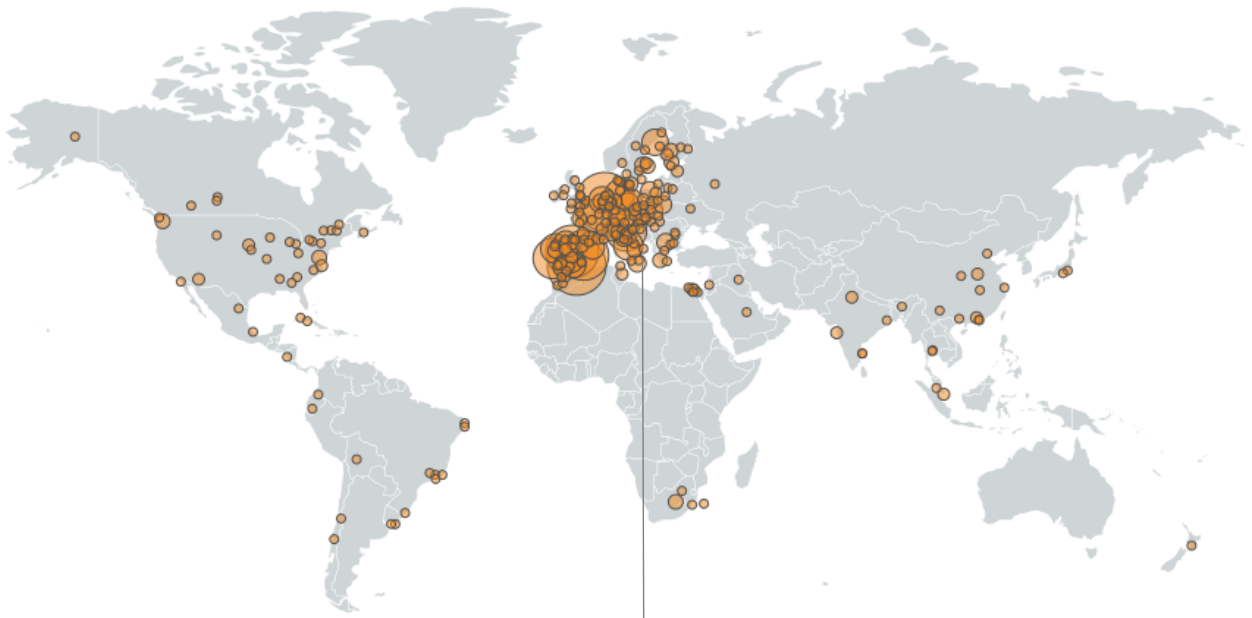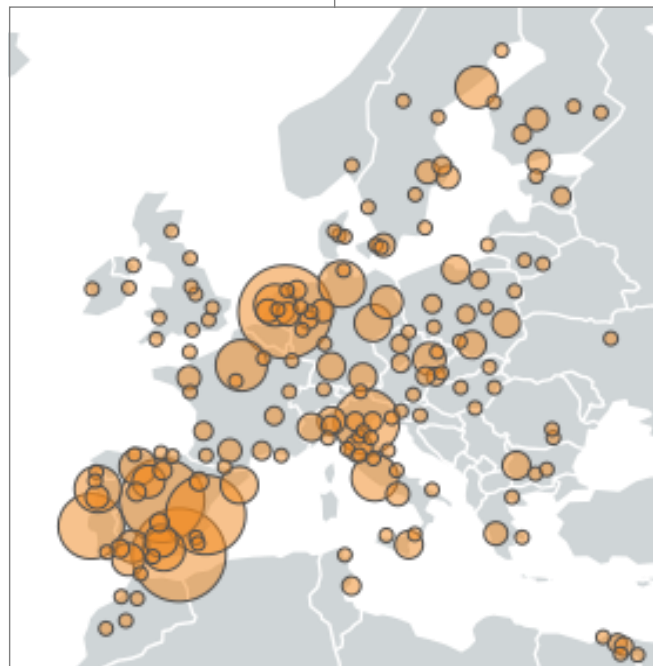

f.

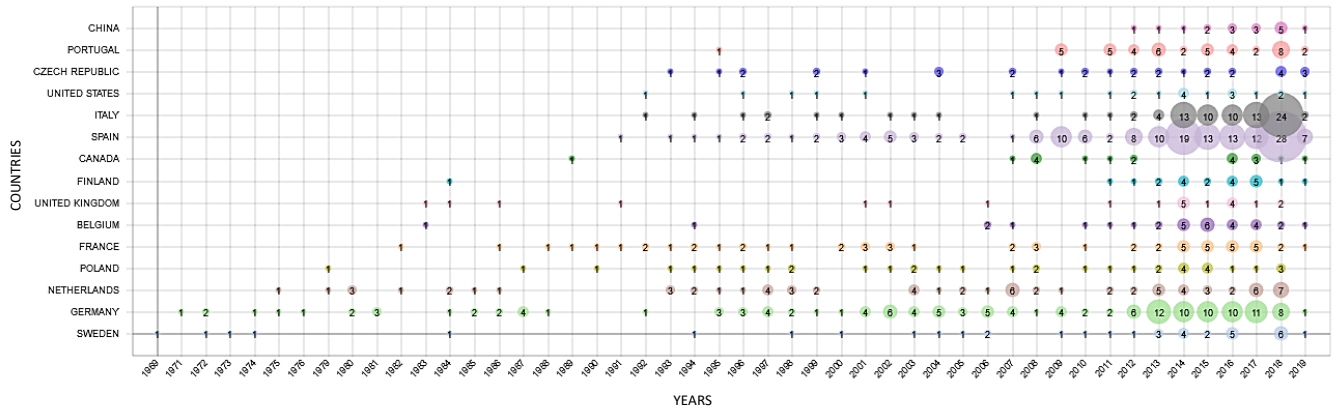

g.

| Countries      | Publications |
|----------------|--------------|
| SPAIN          | 165          |
| GERMANY        | 144          |
| ITALY          | 91           |
| NETHERLANDS    | 74           |
| FRANCE         | 58           |
| PORTUGAL       | 44           |
| SWEDEN         | 38           |
| POLAND         | 37           |
| BELGIUM        | 32           |
| CZECH REPUBLIC | 32           |
| UNITED STATES  | 24           |
| FINLAND        | 22           |
| UNITED KINGDOM | 22           |
| CANADA         | 19           |
| CHINA          | 17           |

h.

| Cities     | Publications |
|------------|--------------|
| Almeria    | 38           |
| Wageningen | 38           |
| Madrid     | 33           |
| Valencia   | 31           |
| Lisbon     | 25           |
| Padova     | 24           |
| Paris      | 18           |
| Hamburg    | 17           |
| Porto      | 17           |
| Rome       | 16           |
| Granada    | 14           |
| Umea       | 14           |
| Amsterdam  | 13           |
| Barcelona  | 11           |
| Leipzig    | 11           |

i.

| Emerging concepts                   | GF |
|-------------------------------------|----|
| <i>Springer nature</i>              | 14 |
| <i>Springer verlag gmbh</i>         | 9  |
| <i>Springer verlag gmbh germany</i> | 7  |
| <i>Tetradasmus</i>                  | 5  |
| <i>Tetradasmus obliquus</i>         | 5  |
| <i>Biostimulant</i>                 | 4  |
| <i>Informa</i>                      | 4  |
| <i>Informa uk</i>                   | 4  |
| <i>Informa uk limit</i>             | 4  |
| <i>Livestock</i>                    | 4  |
| <i>Phosphorus removal rate</i>      | 4  |
| <i>Root</i>                         | 4  |
| <i>Tailor</i>                       | 4  |
| <i>Trad</i>                         | 4  |
| <i>Uk</i>                           | 4  |
| <i>Batch operation</i>              | 3  |
| <i>Biomass grown</i>                | 3  |
| <i>Centrate</i>                     | 3  |
| <i>Corn</i>                         | 3  |
| <i>Cylindrical</i>                  | 3  |

j.

| Journals and number of publications             | IF    | Publications |
|-------------------------------------------------|-------|--------------|
| BIORESOURCE TECHNOLOGY                          | 6,669 | 70           |
| JOURNAL OF APPLIED PHYCOLOGY                    | 2,635 | 34           |
| Algal Research-Biomass Biofuels and Bioproducts | 3,723 | 31           |
| HYDROBIOLOGIA                                   | 2,325 | 23           |
| WATER RESEARCH                                  | 7,913 | 19           |
| Chemical Engineering Transactions               | -     | 13           |
| CHEMOSPHERE                                     | 5,108 | 11           |
| APPLIED MICROBIOLOGY AND BIOTECHNOLOGY          | 3,67  | 10           |
| JOURNAL OF BIOTECHNOLOGY                        | 3,163 | 10           |
| AQUATIC TOXICOLOGY                              | 3,794 | 9            |
| ENVIRONMENTAL SCIENCE AND POLLUTION RESEARCH    | 2,914 | 9            |
| FRESHWATER BIOLOGY                              | 3,404 | 8            |
| JOURNAL OF PLANKTON RESEARCH                    | 2,209 | 8            |
| PHYTOCHEMISTRY                                  | 2,905 | 8            |
| WATER SCIENCE AND TECHNOLOGY                    | 1,624 | 8            |

k.

| Title of publications                                                                                                                                                | Citations | Date |
|----------------------------------------------------------------------------------------------------------------------------------------------------------------------|-----------|------|
| Microalgae as a raw material for biofuels production                                                                                                                 | 727       | 2009 |
| Microalgae as substrates for fermentative biogas production in a combined biorefinery concept                                                                        | 332       | 2010 |
| The impact of nitrogen starvation on the dynamics of triacylglycerol accumulation in nine microalgae strains                                                         | 259       | 2012 |
| Nitrogen and phosphorus removal from urban wastewater by the microalga <i>Scenedesmus obliquus</i>                                                                   | 250       | 2000 |
| Protein measurements of microalgal and cyanobacterial biomass                                                                                                        | 233       | 2010 |
| Production cost of a real microalgae production plant and strategies to reduce it                                                                                    | 218       | 2012 |
| Competition for light between phytoplankton species: Experimental tests of mechanistic theory                                                                        | 213       | 1999 |
| Allelopathic growth inhibition of selected phytoplankton species by submerged macrophytes                                                                            | 209       | 2002 |
| Phytoplankton, not allochthonous carbon, sustains herbivorous zooplankton production                                                                                 | 199       | 2009 |
| Photosynthetic inorganic carbon use by freshwater plants                                                                                                             | 199       | 1983 |
| Flocculation of microalgae using cationic starch                                                                                                                     | 193       | 2010 |
| Determination of limiting polyunsaturated fatty acids in <i>Daphnia galeata</i> using a new method to enrich food algae with single fatty acids                      | 187       | 2002 |
| Removal of nitrogen and phosphorus from wastewater using microalgae immobilized on twin layers: An experimental study                                                | 185       | 2007 |
| Use of chlorophyll fluorescence in metal-stress research: A case study with the green microalga <i>Scenedesmus</i>                                                   | 165       | 2003 |
| Chemical evidence of kerogen formation in source rocks and oil shales via selective preservation of thin resistant outer walls of microalgae: Origin of ultralaminae | 160       | 1991 |

**S1.** Bibliometric overview of the research on *Scenedesmus* sp. in 733 European scientific papers. Main concepts (a), concepts network (b), annual production (c), global collaborations (d), European collaborations (e), annual production by countries (f), main countries (g), main cities (h), emerging concepts (i), main journals (j) and main citations (k).



d.

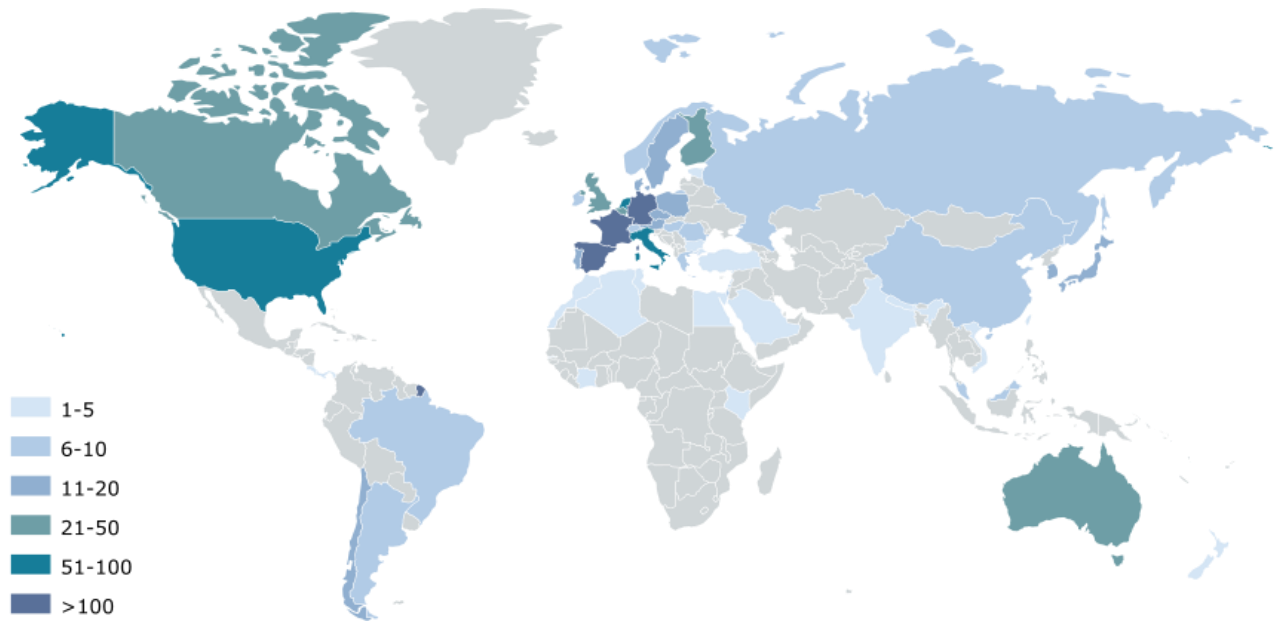

e.

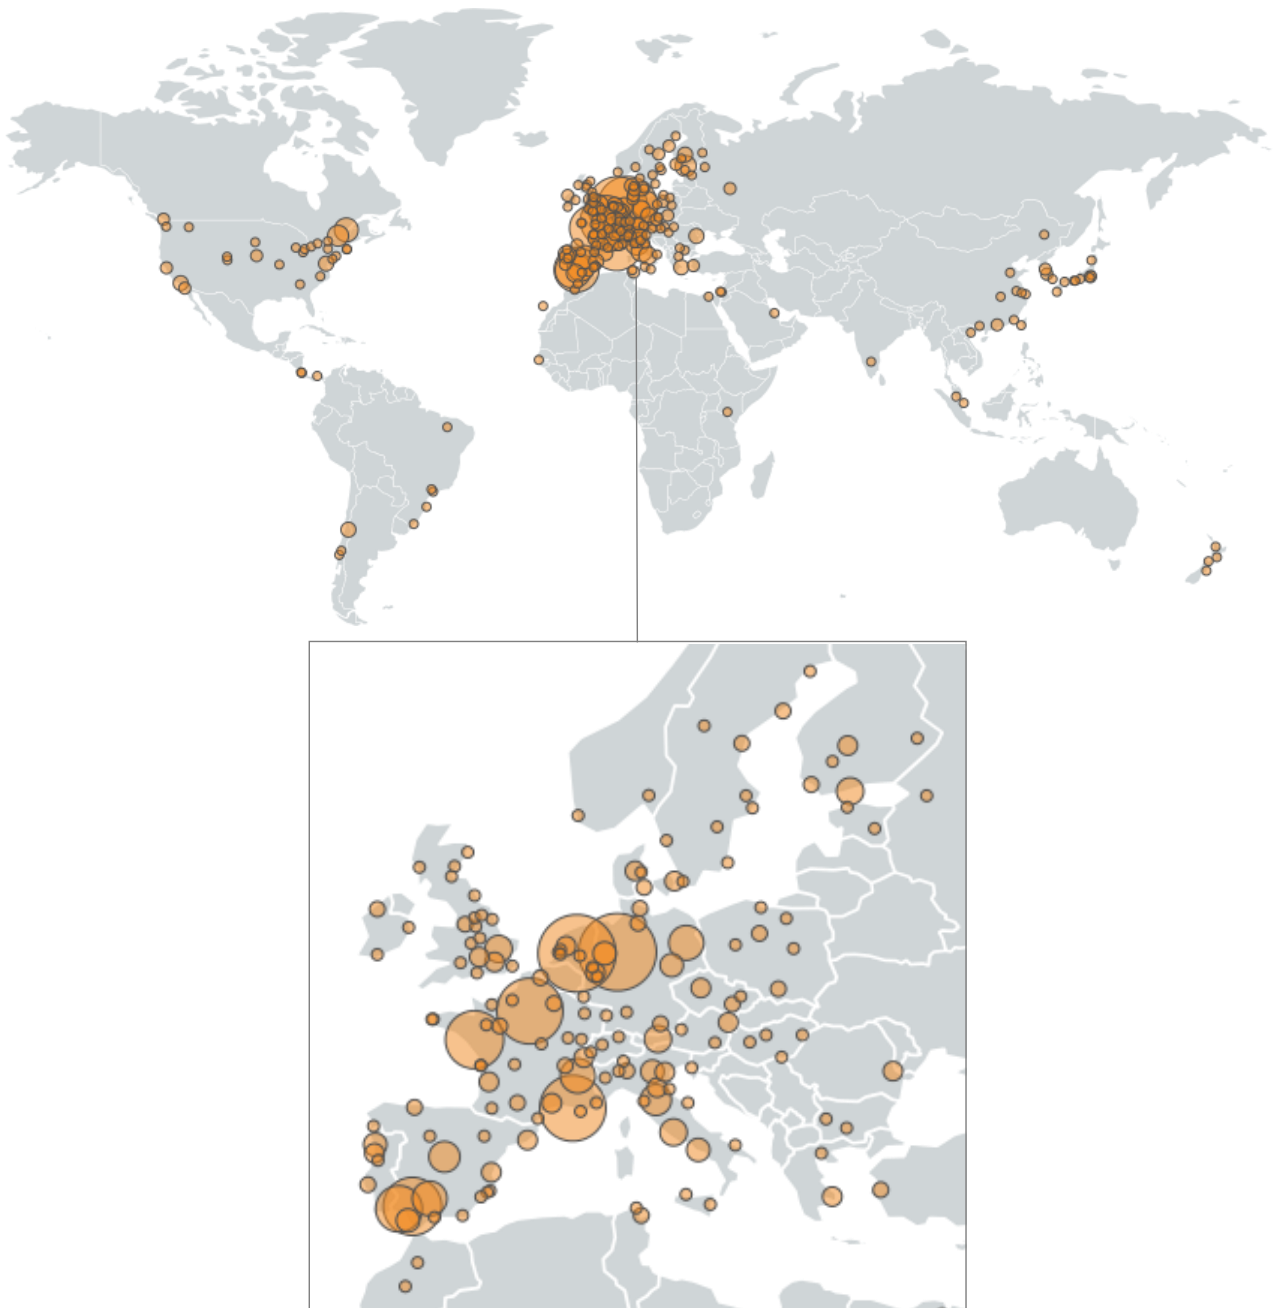

f.

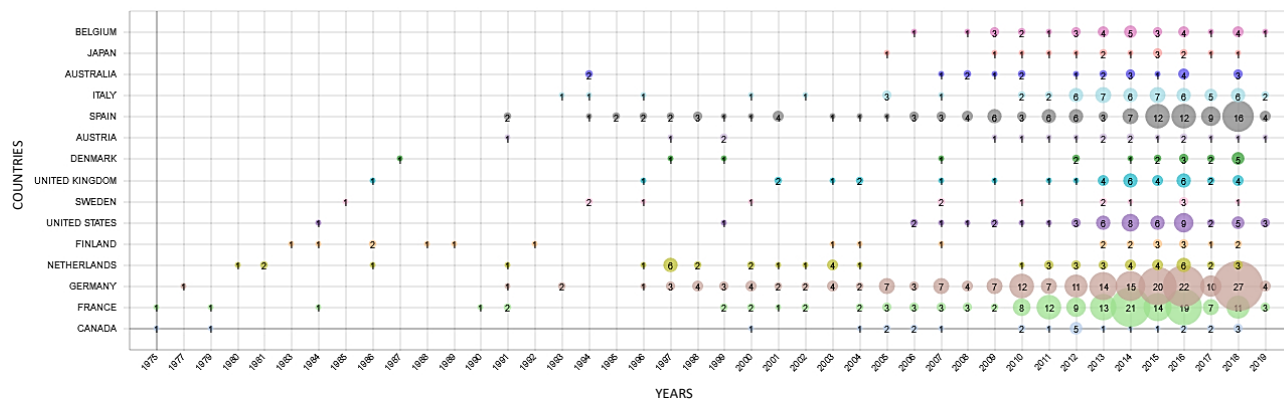

g.

| Countries      | Publications |
|----------------|--------------|
| GERMANY        | 199          |
| FRANCE         | 146          |
| SPAIN          | 115          |
| ITALY          | 58           |
| NETHERLANDS    | 52           |
| UNITED STATES  | 52           |
| UNITED KINGDOM | 37           |
| BELGIUM        | 33           |
| CANADA         | 27           |
| FINLAND        | 23           |
| AUSTRALIA      | 22           |
| DENMARK        | 19           |
| AUSTRIA        | 18           |
| JAPAN          | 15           |
| SWEDEN         | 15           |

h.

| Cities     | Publications |
|------------|--------------|
| Bielefeld  | 41           |
| Wageningen | 40           |
| Marseille  | 34           |
| Paris      | 33           |
| Nantes     | 30           |
| Seville    | 30           |
| Huelva     | 22           |
| Berlin     | 16           |
| Grenoble   | 16           |
| Cordoba    | 14           |
| Florence   | 12           |
| Madrid     | 12           |
| Quebec     | 12           |
| Montreal   | 11           |
| Cambridge  | 10           |

i.

| Emerging concepts            | GF |
|------------------------------|----|
| <i>Friendly</i>              | 5  |
| <i>Springer nature</i>       | 5  |
| <i>Harbor</i>                | 4  |
| <i>Hinder</i>                | 4  |
| <i>Intron</i>                | 4  |
| <i>Confocal</i>              | 3  |
| <i>Cyclase</i>               | 3  |
| <i>Elisa</i>                 | 3  |
| <i>European society</i>      | 3  |
| <i>Green cell factory</i>    | 3  |
| <i>Isoprenoid</i>            | 3  |
| <i>Membrane bioreactor</i>   | 3  |
| <i>Microalgae population</i> | 3  |
| <i>Photobiology</i>          | 3  |
| <i>Photobiology 2018</i>     | 3  |
| <i>Proline</i>               | 3  |
| <i>Rna seq data</i>          | 3  |
| <i>Surprisal analysis</i>    | 3  |
| <i>Agar plate</i>            | 2  |
| <i>Alternative strategy</i>  | 2  |

j.

| Journals and number of publications             | IF    | Publications |
|-------------------------------------------------|-------|--------------|
| Algal Research-Biomass Biofuels and Bioproducts | 3,723 | 28           |
| HYDROBIOLOGIA                                   | 2,325 | 22           |
| BIORESOURCE TECHNOLOGY                          | 6,669 | 21           |
| JOURNAL OF BIOTECHNOLOGY                        | 3,163 | 19           |
| JOURNAL OF APPLIED PHYCOLOGY                    | 2,635 | 17           |
| PLANT PHYSIOLOGY                                | 6,305 | 15           |
| PHOTOSYNTHESIS RESEARCH                         | 3,057 | 12           |
| AQUATIC TOXICOLOGY                              | 3,794 | 12           |
| FRESHWATER BIOLOGY                              | 3,404 | 11           |
| PLoS One                                        | 2,776 | 11           |
| EUROPEAN JOURNAL OF PHYCOLOGY                   | 2,526 | 10           |
| INTERNATIONAL JOURNAL OF HYDROGEN ENERGY        | 4,084 | 9            |
| APPLIED MICROBIOLOGY AND BIOTECHNOLOGY          | 3,67  | 9            |
| BIOTECHNOLOGY AND BIOENGINEERING                | 4,26  | 9            |
| Scientific Reports                              | 4,011 | 9            |

k.

| Title of publications                                                                                                                                                                   | Citations | Date |
|-----------------------------------------------------------------------------------------------------------------------------------------------------------------------------------------|-----------|------|
| An outlook on microalgal biofuels                                                                                                                                                       | 1049      | 2010 |
| Toxicity of silver nanoparticles to <i>Chlamydomonas reinhardtii</i>                                                                                                                    | 965       | 2008 |
| Oil accumulation in the model green alga <i>Chlamydomonas reinhardtii</i> :<br>Characterization, variability between common laboratory strains and relationship<br>with starch reserves | 372       | 2011 |
| The dynamics of photosynthesis                                                                                                                                                          | 351       | 2008 |
| Microalgae as substrates for fermentative biogas production in a combined<br>biorefinery concept                                                                                        | 332       | 2010 |
| <i>Chlamydomonas</i> starchless mutant defective in ADP-glucose pyrophosphorylase<br>hyper-accumulates triacylglycerol                                                                  | 202       | 2010 |
| Altered cell wall morphology in nutrient-deficient phytoplankton and its impact on<br>grazers                                                                                           | 183       | 1997 |
| Potential of industrial biotechnology with cyanobacteria and eukaryotic microalgae                                                                                                      | 177       | 2013 |
| Transgenic microalgae as green cell-factories                                                                                                                                           | 159       | 2004 |
| Effective viscosity of microswimmer suspensions                                                                                                                                         | 149       | 2010 |
| A fully predictive model for one-dimensional light attenuation by <i>Chlamydomonas<br/>reinhardtii</i> in a torus photobioreactor                                                       | 140       | 2005 |
| UV-absorbing mycosporine-like compounds in planktonic and benthic organisms<br>from a high-mountain lake                                                                                | 138       | 1999 |
| Microalgal carbohydrates: An overview of the factors influencing carbohydrates<br>production, and of main bioconversion technologies for production of biofuels                         | 131       | 2012 |
| Central carbon metabolism and electron transport in <i>Chlamydomonas reinhardtii</i> :<br>Metabolic constraints for carbon partitioning between oil and starch                          | 130       | 2013 |
| The genome of the polar eukaryotic microalga <i>Coccomyxa subellipsoidea</i> reveals<br>traits of cold adaptation                                                                       | 130       | 2012 |

**S2.** Bibliometric overview of the research on *Chlamydomonas* sp. in 641 European scientific papers. Main concepts (a), concepts network (b), annual production (c), global collaborations (d), European collaborations (e), annual production by countries (f), main countries (g), main cities (h), emerging concepts (i), main journals (j) and main citations (k).





d.

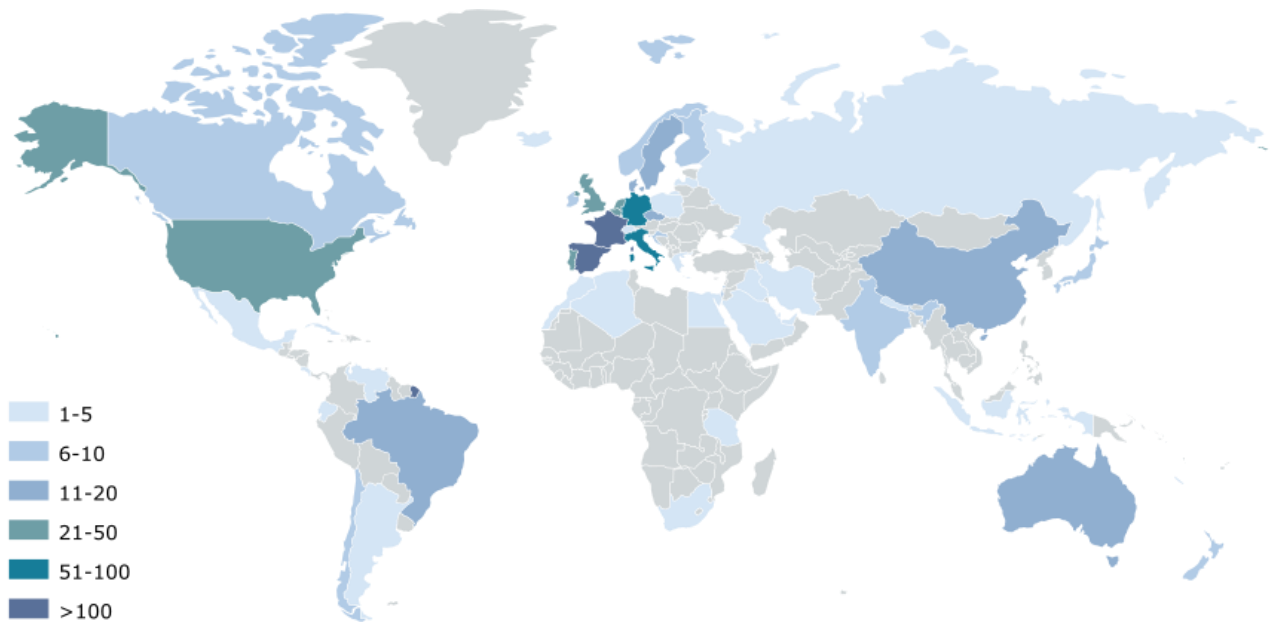

e.

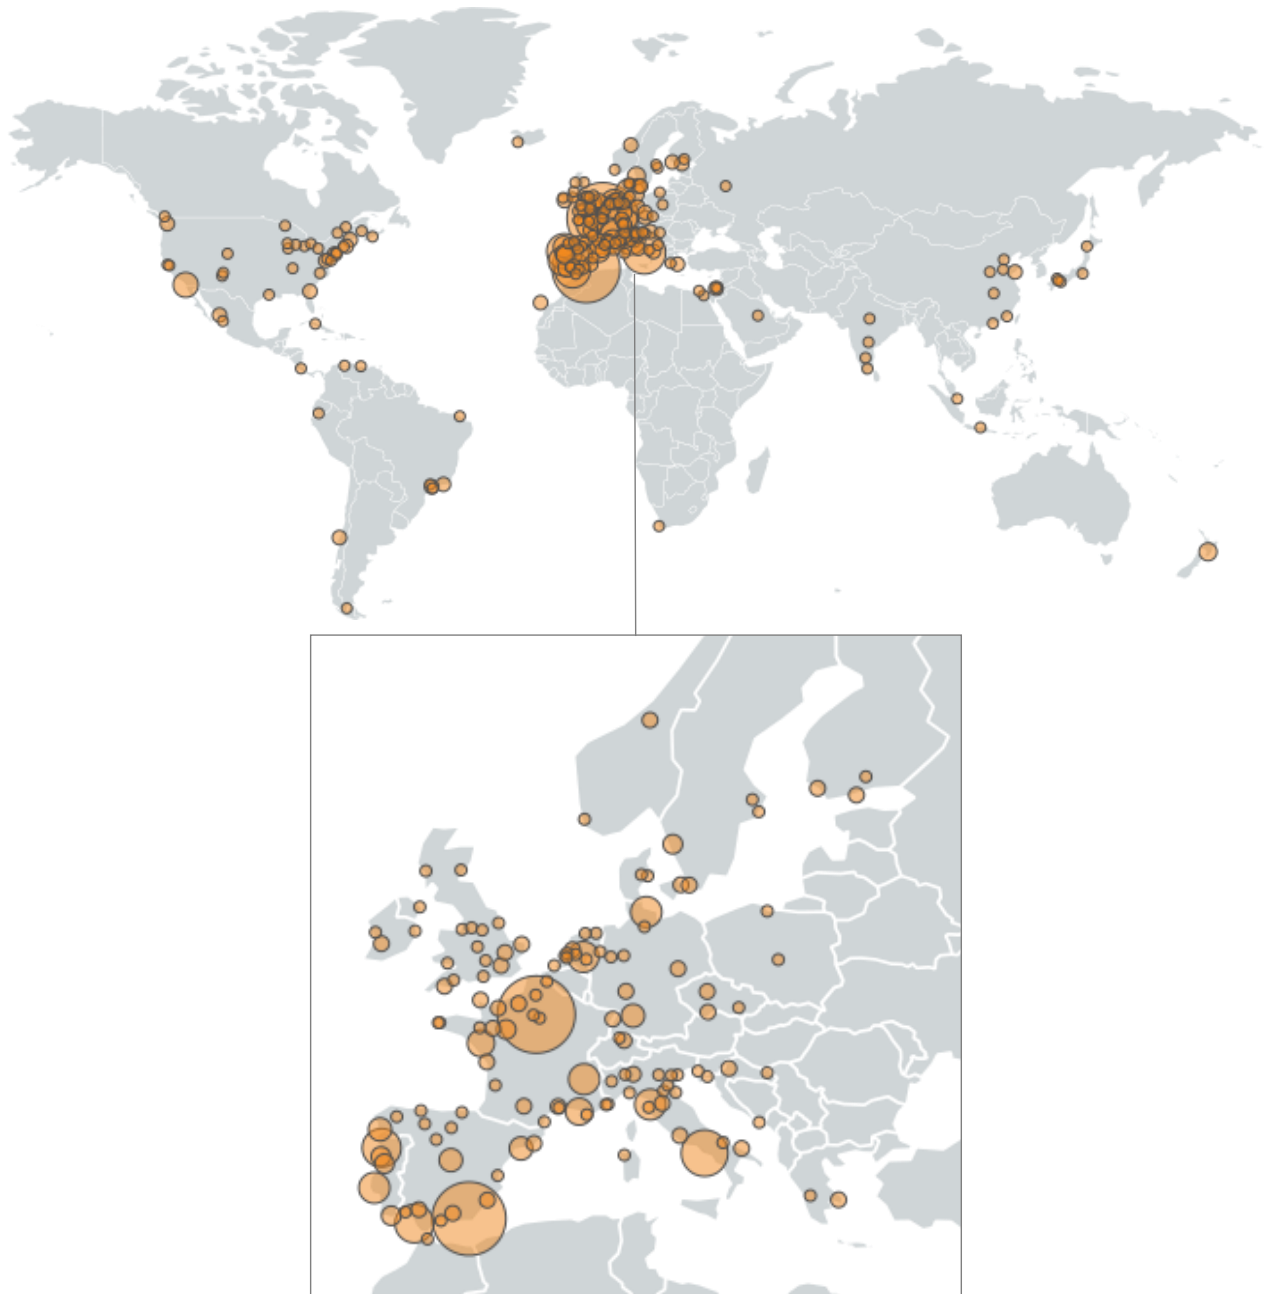

f.

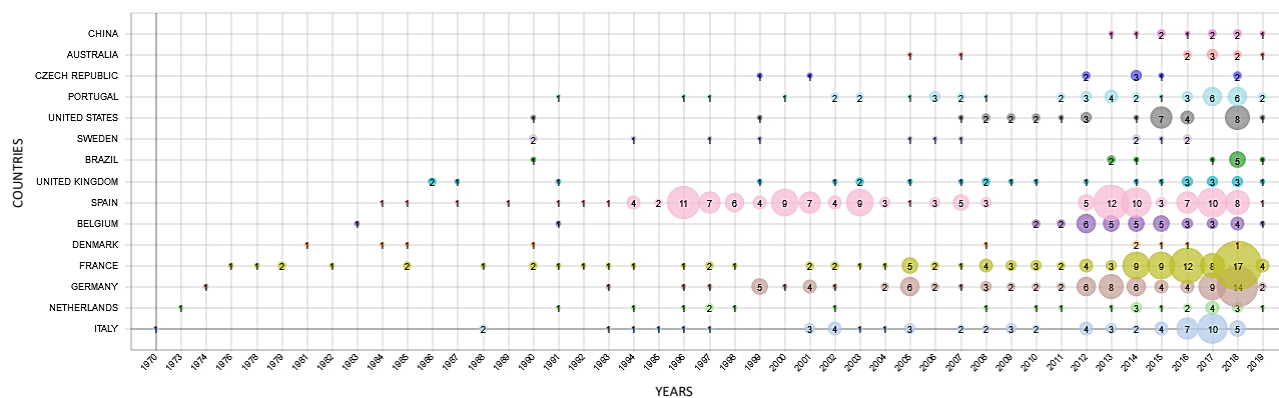

g.

| Countries      | Publications |
|----------------|--------------|
| SPAIN          | 141          |
| FRANCE         | 110          |
| GERMANY        | 88           |
| ITALY          | 64           |
| PORTUGAL       | 44           |
| BELGIUM        | 38           |
| UNITED STATES  | 34           |
| UNITED KINGDOM | 27           |
| NETHERLANDS    | 26           |
| SWEDEN         | 13           |
| BRAZIL         | 11           |
| AUSTRALIA      | 10           |
| CHINA          | 10           |
| CZECH REPUBLIC | 10           |
| DENMARK        | 10           |

h.

| Cities     | Publications |
|------------|--------------|
| Paris      | 48           |
| Almeria    | 44           |
| Naples     | 27           |
| Cadiz      | 21           |
| Porto      | 19           |
| Kiel       | 16           |
| Lisbon     | 16           |
| Pisa       | 16           |
| Grenoble   | 14           |
| Wageningen | 14           |
| Marseille  | 12           |
| Nantes     | 12           |
| San Diego  | 11           |
| Stuttgart  | 9            |
| Tarragone  | 9            |

i.

| Emerging concepts               | GF |
|---------------------------------|----|
| <i>Springer nature</i>          | 7  |
| <i>Edit</i>                     | 5  |
| <i>Genome edit</i>              | 5  |
| <i>Ph value</i>                 | 5  |
| <i>Cas9</i>                     | 4  |
| <i>Crispr</i>                   | 4  |
| <i>Crispr cas9</i>              | 4  |
| <i>Effector</i>                 | 4  |
| <i>Mrna</i>                     | 4  |
| <i>Ph 8</i>                     | 4  |
| <i>Bioactivity</i>              | 3  |
| <i>Delivery</i>                 | 3  |
| <i>Drug</i>                     | 3  |
| <i>Nannochloropsis oceanica</i> | 3  |
| <i>Native</i>                   | 3  |
| <i>Overview</i>                 | 3  |
| <i>Volumetric productivity</i>  | 3  |
| <i>Algal strain</i>             | 2  |
| <i>Architecture</i>             | 2  |
| <i>Autofluorescence</i>         | 2  |

j.

| Journals and number of publications                | IF    | Publications |
|----------------------------------------------------|-------|--------------|
| JOURNAL OF APPLIED PHYCOLOGY                       | 2,635 | 22           |
| BIORESOURCE TECHNOLOGY                             | 6,669 | 20           |
| Algal Research-Biomass Biofuels and Bioproducts    | 3,723 | 16           |
| JOURNAL OF PHYCOLOGY                               | 2,831 | 13           |
| SCIENCE OF THE TOTAL ENVIRONMENT                   | 5,589 | 11           |
| PLANT PHYSIOLOGY                                   | 6,305 | 10           |
| JOURNAL OF EXPERIMENTAL MARINE BIOLOGY AND ECOLOGY | 2,365 | 10           |
| AQUACULTURE                                        | 3,022 | 10           |
| BIOTECHNOLOGY AND BIOENGINEERING                   | 4,26  | 8            |
| PLoS One                                           | 2,776 | 8            |
| Marine Drugs                                       | 3,772 | 7            |
| MARINE BIOLOGY                                     | 2,134 | 7            |
| MARINE CHEMISTRY                                   | 2,713 | 6            |
| MARINE ECOLOGY PROGRESS SERIES                     | 2,359 | 6            |
| MARINE ENVIRONMENTAL RESEARCH                      | 3,445 | 6            |

k.

| Title of publications                                                                                                                                         | Citations | Date |
|---------------------------------------------------------------------------------------------------------------------------------------------------------------|-----------|------|
| Recovery of microalgal biomass and metabolites: Process options and economics                                                                                 | 1146      | 2003 |
| An outlook on microalgal biofuels                                                                                                                             | 1049      | 2010 |
| Tubular photobioreactor design for algal cultures                                                                                                             | 336       | 2001 |
| Feeding and digestion by the mussel <i>Mytilus edulis</i> L. (Bivalvia: Mollusca) in mixtures of silt and algal cells at low concentrations                   | 246       | 1987 |
| Whole-cell response of the pennate diatom <i>Phaeodactylum tricorutum</i> to iron starvation                                                                  | 222       | 2008 |
| Effects of growth rate, CO <sub>2</sub> concentration, and cell size on the stable carbon isotope fractionation in marine phytoplankton                       | 197       | 1999 |
| Flocculation of microalgae using cationic starch                                                                                                              | 193       | 2010 |
| Biomass production and variation in the biochemical profile (total protein, carbohydrates, RNA, lipids and fatty acids) of seven species of marine microalgae | 190       | 1989 |
| Coagulation efficiency and aggregate formation in marine phytoplankton                                                                                        | 187       | 1990 |
| Influence of the diadinoxanthin pool size on photoprotection in the marine planktonic diatom <i>Phaeodactylum tricorutum</i>                                  | 182       | 2002 |
| Gene silencing in the marine diatom <i>Phaeodactylum tricorutum</i>                                                                                           | 180       | 2009 |
| Airlift-driven external-loop tubular photobioreactors for outdoor production of microalgae: Assessment of design and performance                              | 173       | 2001 |
| A model for light distribution and average solar irradiance inside outdoor tubular photobioreactors for the microalgal mass culture                           | 167       | 1997 |
| Algae displaying the diadinoxanthin cycle also possess the violaxanthin cycle                                                                                 | 162       | 1999 |
| The application of micro-FTIR spectroscopy to analyze nutrient stress-related changes in biomass composition of phytoplankton algae                           | 161       | 2005 |

**S3.** Bibliometric overview of the research on *Phaeodactylum* sp. in 478 European scientific papers. Main concepts (a), concepts network (b), annual production (c), global collaborations (d), European collaborations (e), annual production by countries (f), main countries (g), main cities (h), emerging concepts (i), main journals (j) and main citations (k).



d.

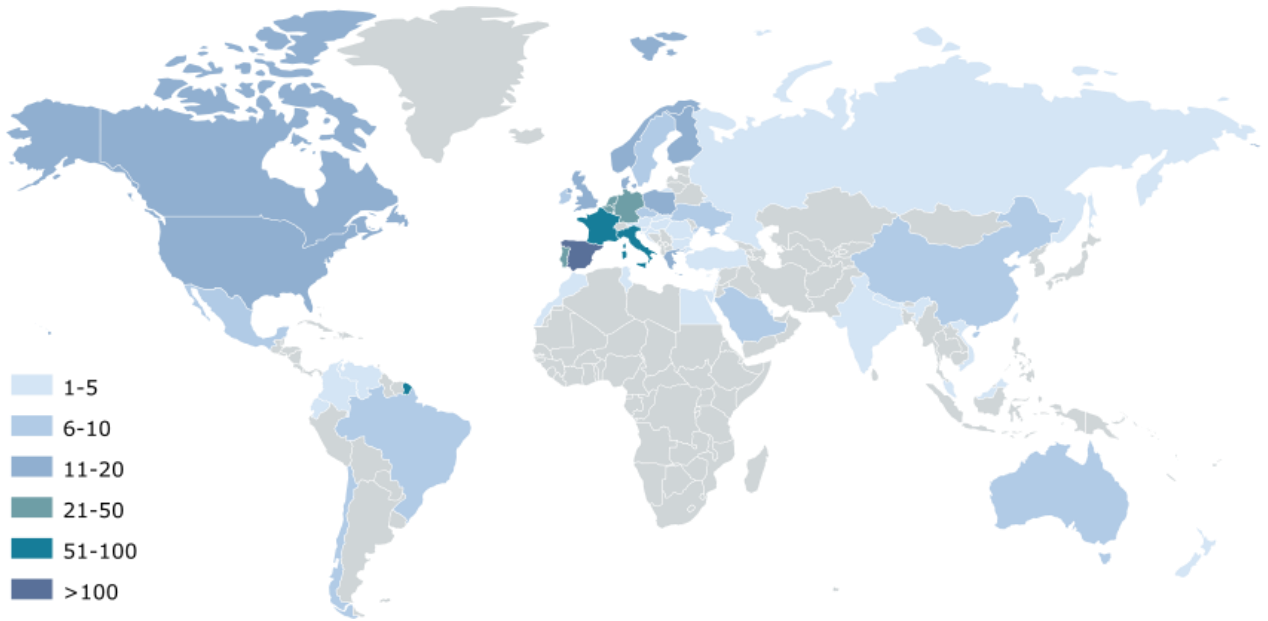

e.

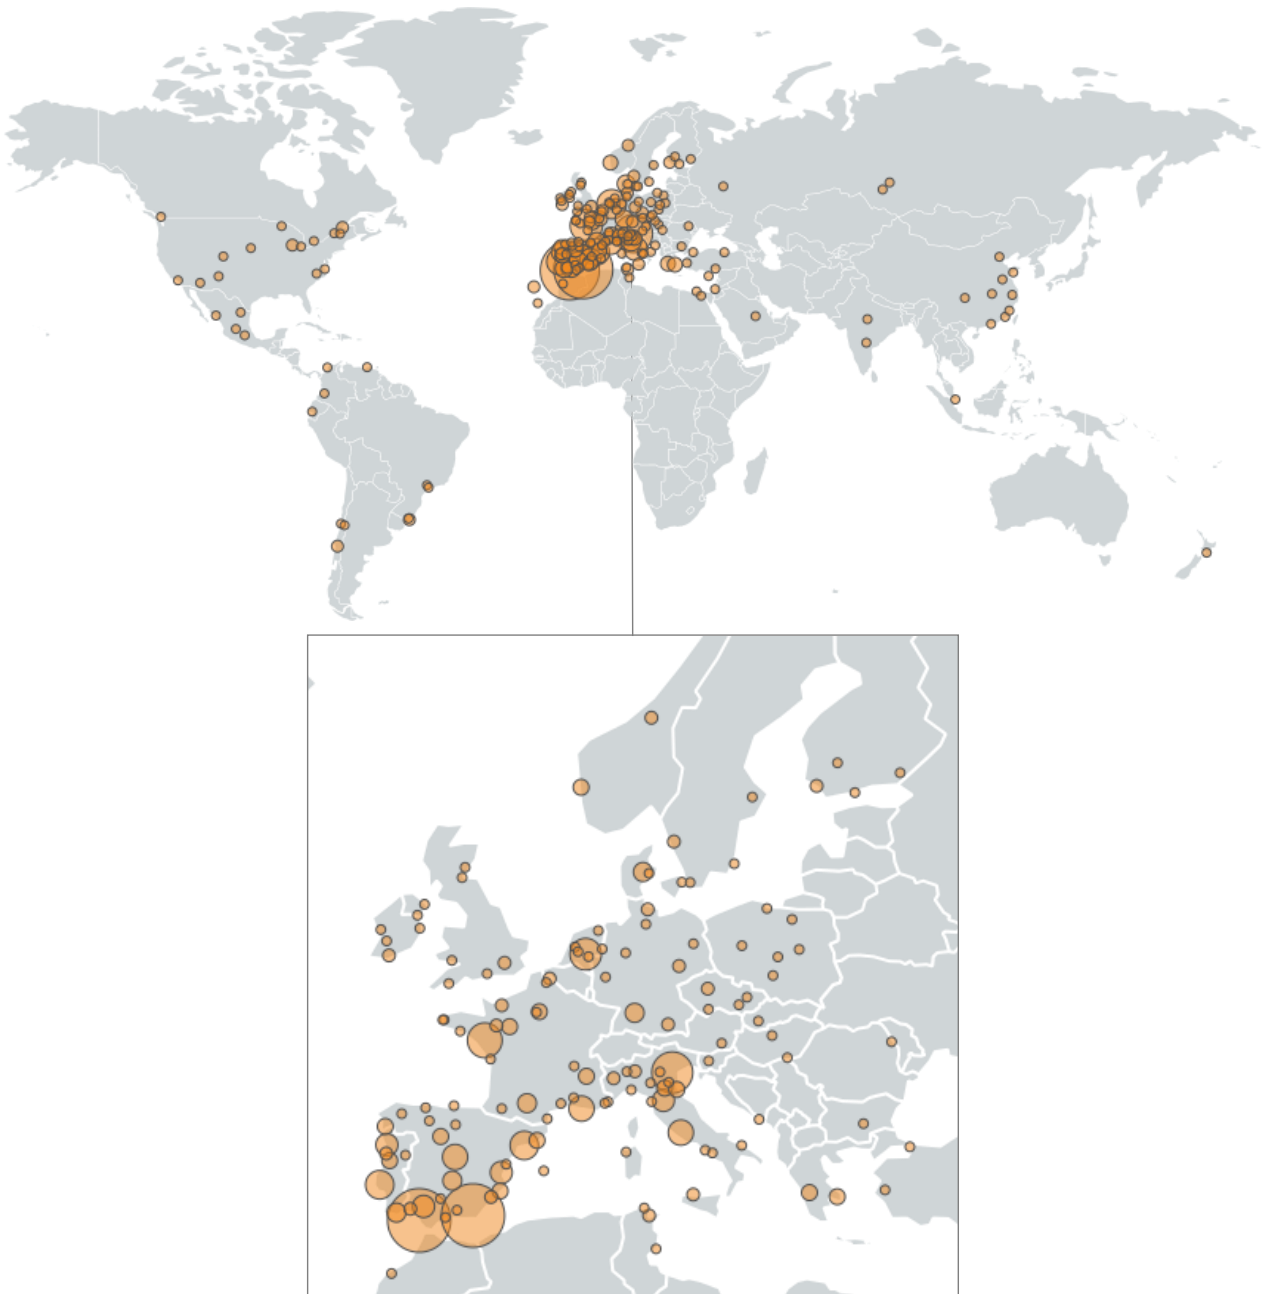

f.

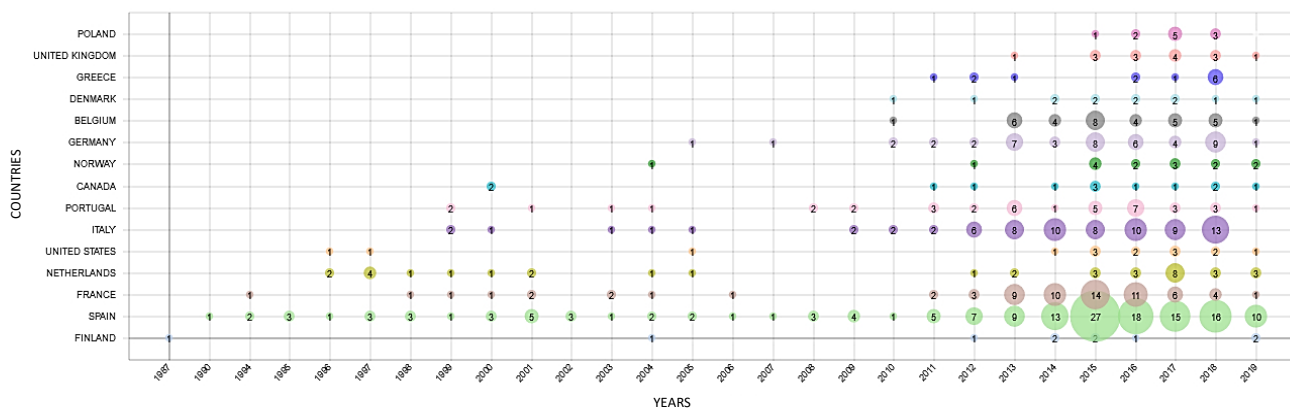

g.

| Countries      | Publications |
|----------------|--------------|
| SPAIN          | 160          |
| ITALY          | 76           |
| FRANCE         | 70           |
| GERMANY        | 46           |
| PORTUGAL       | 40           |
| NETHERLANDS    | 36           |
| BELGIUM        | 34           |
| NORWAY         | 15           |
| UNITED KINGDOM | 15           |
| UNITED STATES  | 15           |
| CANADA         | 13           |
| GREECE         | 13           |
| DENMARK        | 12           |
| POLAND         | 11           |
| FINLAND        | 10           |

h.

| Cities     | Publications |
|------------|--------------|
| Cadiz      | 42           |
| Almeria    | 41           |
| Padova     | 26           |
| Nantes     | 21           |
| Wageningen | 19           |
| Lisbon     | 16           |
| Tarragone  | 15           |
| Rome       | 14           |
| Marseille  | 13           |
| Madrid     | 12           |
| Florence   | 11           |
| Porto      | 11           |
| Seville    | 10           |
| Valencia   | 10           |
| Stuttgart  | 9            |

i.

| Emerging concepts                 | GF |
|-----------------------------------|----|
| Springer nature                   | 8  |
| Switzerland                       | 5  |
| Basel                             | 4  |
| Farm                              | 4  |
| John                              | 4  |
| John wiley                        | 4  |
| Maintenance                       | 4  |
| Son                               | 4  |
| Bioavailability                   | 3  |
| Coal                              | 3  |
| Economy                           | 3  |
| Fishery                           | 3  |
| Food chain                        | 3  |
| Gamma                             | 3  |
| Human consumption                 | 3  |
| Nan                               | 3  |
| Nannochloropsis oceanica ccmp1779 | 3  |
| Oceanica ccmp1779                 | 3  |
| Render                            | 3  |
| Separately                        | 3  |

j.

| Journals and number of publications             | IF    | Publications |
|-------------------------------------------------|-------|--------------|
| BIORESOURCE TECHNOLOGY                          | 6,669 | 62           |
| Algal Research-Biomass Biofuels and Bioproducts | 3,723 | 47           |
| JOURNAL OF APPLIED PHYCOLOGY                    | 2,635 | 25           |
| AQUACULTURE                                     | 3,022 | 14           |
| Marine Drugs                                    | 3,772 | 10           |
| FOOD CHEMISTRY                                  | 5,399 | 8            |
| ORGANIC GEOCHEMISTRY                            | 3,12  | 7            |
| Biotechnology for Biofuels                      | 5,452 | 7            |
| Chemical Engineering Transactions               | -     | 7            |
| PLoS One                                        | 2,776 | 6            |
| PHYTOCHEMISTRY                                  | 2,905 | 6            |
| HYDROBIOLOGIA                                   | 2,325 | 6            |
| JOURNAL OF AGRICULTURAL AND FOOD CHEMISTRY      | 3,571 | 6            |
| FUEL                                            | 5,128 | 5            |
| AQUACULTURE RESEARCH                            | 1,502 | 5            |

k.

| Title of publications                                                                                                                                                                                                 | Citations | Date |
|-----------------------------------------------------------------------------------------------------------------------------------------------------------------------------------------------------------------------|-----------|------|
| Microalgae for oil: Strain selection, induction of lipid synthesis and outdoor mass cultivation in a low-cost photobioreactor                                                                                         | 1585      | 2009 |
| Microalgae as a raw material for biofuels production                                                                                                                                                                  | 727       | 2009 |
| Effect of temperature and nitrogen concentration on the growth and lipid content of <i>Nannochloropsis oculata</i> and <i>Chlorella vulgaris</i> for biodiesel production                                             | 647       | 2009 |
| Flocculation of microalgae using cationic starch                                                                                                                                                                      | 193       | 2010 |
| Thermogravimetric-mass spectrometric analysis of lignocellulosic and marine biomass pyrolysis                                                                                                                         | 165       | 2012 |
| Cellular DNA content of marine phytoplankton using two new fluorochromes: Taxonomic and ecological implications                                                                                                       | 163       | 1997 |
| Distribution of aliphatic, nonhydrolyzable biopolymers in marine microalgae                                                                                                                                           | 157       | 1999 |
| The response of <i>Nannochloropsis gaditana</i> to nitrogen starvation includes de novo biosynthesis of triacylglycerols, a decrease of chloroplast galactolipids, and reorganization of the photosynthetic apparatus | 156       | 2013 |
| Production of eicosapentaenoic acid by <i>Nannochloropsis</i> sp. cultures in outdoor tubular photobioreactors                                                                                                        | 149       | 1999 |
| Oil production by the marine microalgae <i>Nannochloropsis</i> sp. F&M-M24 and <i>Tetraselmis suecica</i> F&M-M33                                                                                                     | 130       | 2012 |
| Adjusted light and dark cycles can optimize photosynthetic efficiency in algae growing in photobioreactors                                                                                                            | 124       | 2012 |
| Solvent-free' ultrasound-assisted extraction of lipids from fresh microalgae cells: A green, clean and scalable process                                                                                               | 123       | 2012 |
| Resistant biomacromolecules in marine microalgae of the classes eustigmatophyceae and chlorophyceae: Geochemical implications                                                                                         | 123       | 1997 |
| Pyrolysis, combustion and gasification characteristics of <i>Nannochloropsis gaditana</i> microalgae                                                                                                                  | 120       | 2013 |
| Supercritical fluid extraction of carotenoids and chlorophyll a from <i>Nannochloropsis gaditana</i>                                                                                                                  | 116       | 2005 |

**S4.** Bibliometric overview of the research on *Nannochloropsis* sp. in 465 European scientific papers. Main concepts (a), concepts network (b), annual production (c), global collaborations (d), European collaborations (e), annual production by countries (f), main countries (g), main cities (h), emerging concepts (i), main journals (j) and main citations (k).





d.

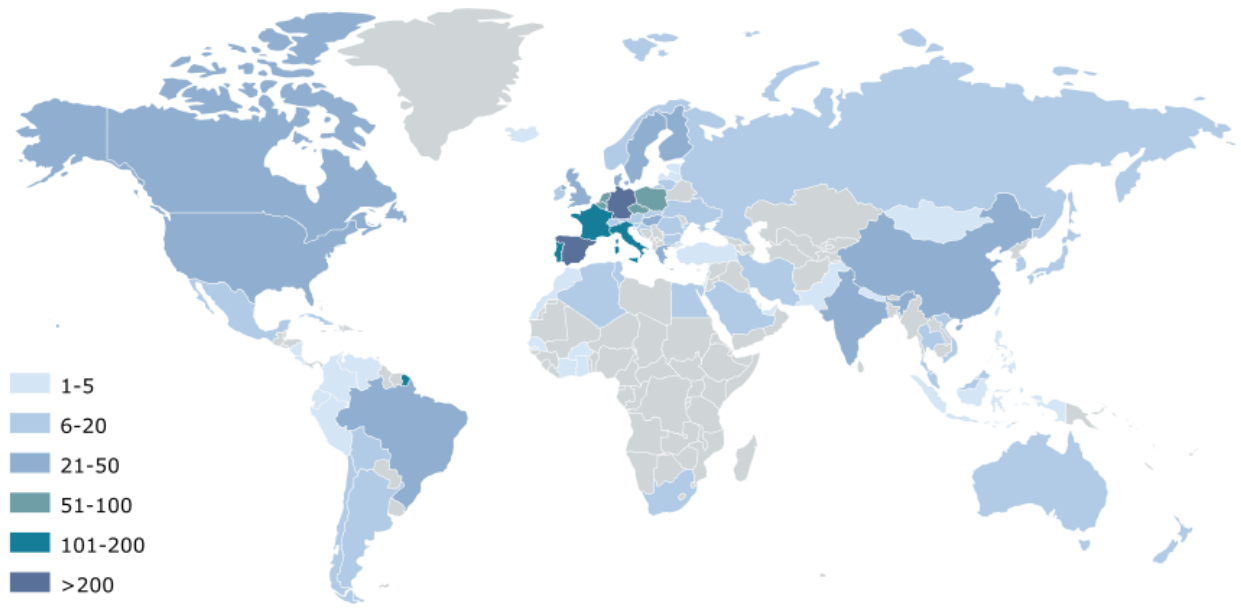

e.

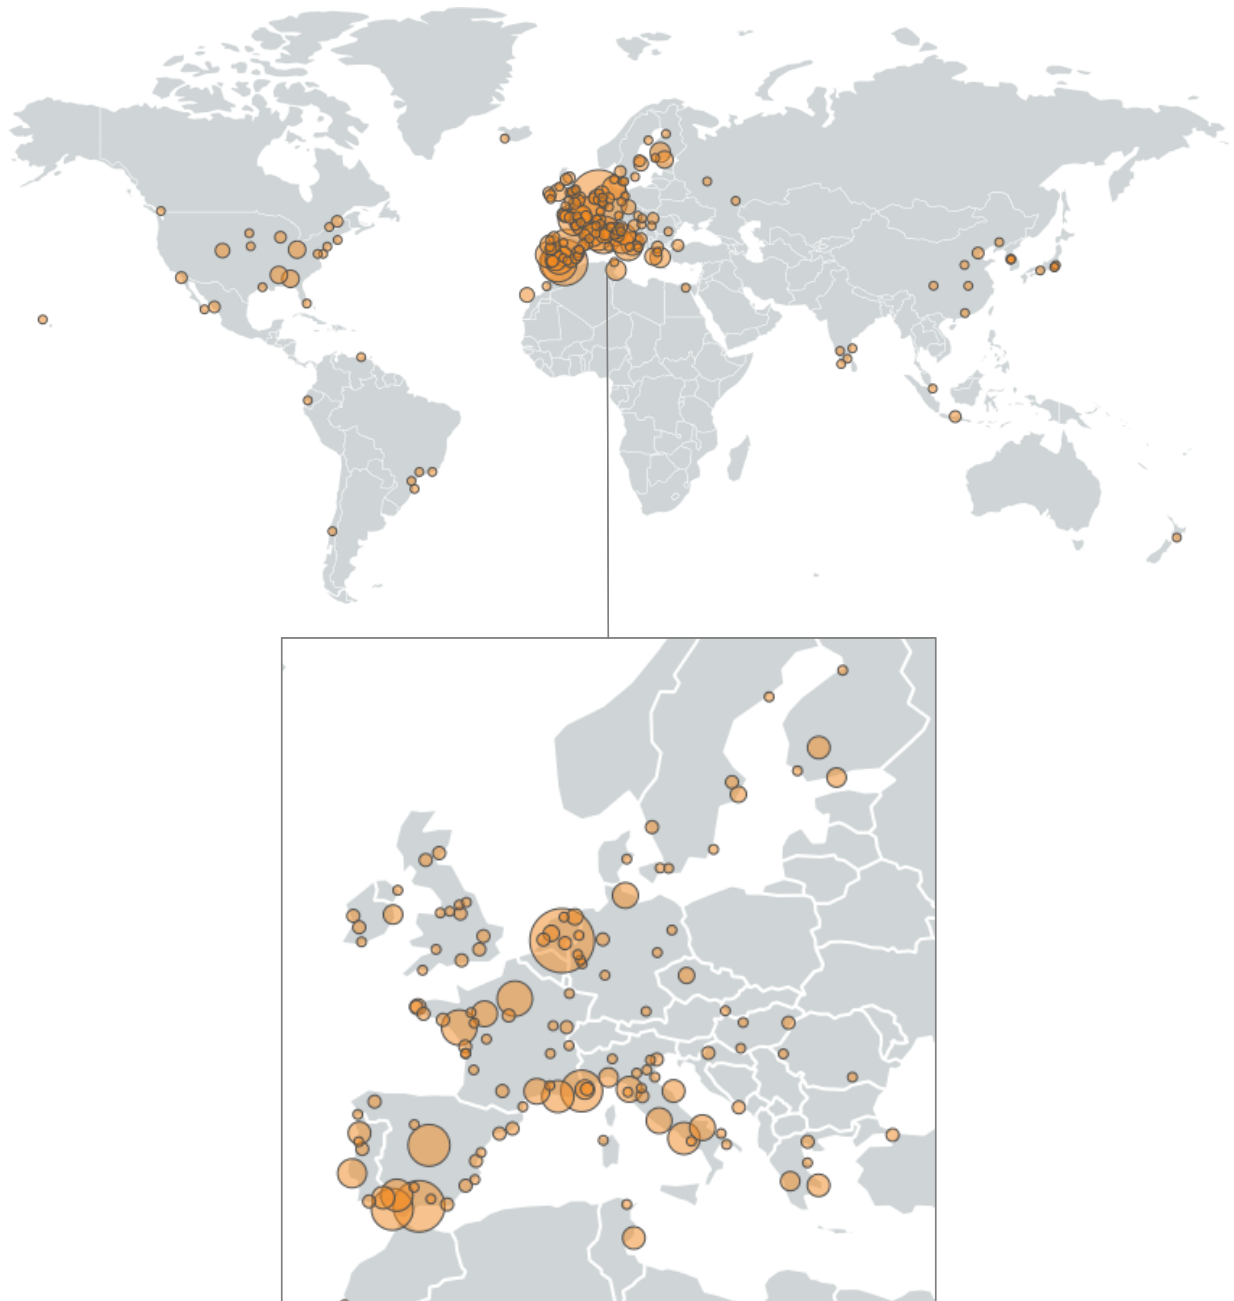

f.

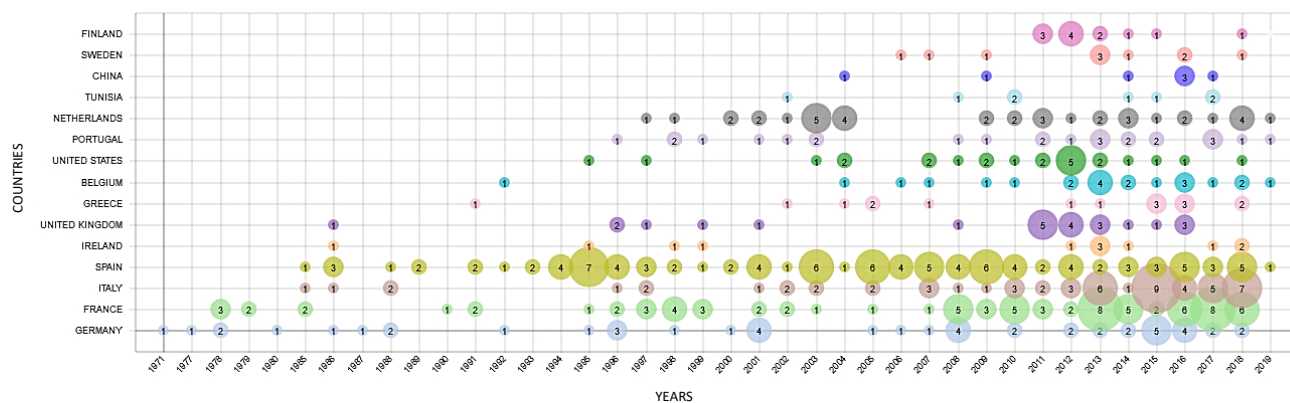

g.

| Countries      | Publications |
|----------------|--------------|
| SPAIN          | 104          |
| FRANCE         | 83           |
| ITALY          | 59           |
| GERMANY        | 48           |
| NETHERLANDS    | 38           |
| PORTUGAL       | 25           |
| UNITED KINGDOM | 24           |
| UNITED STATES  | 24           |
| BELGIUM        | 22           |
| GREECE         | 16           |
| FINLAND        | 12           |
| IRELAND        | 12           |
| SWEDEN         | 10           |
| TUNISIA        | 8            |
| CHINA          | 7            |

h.

| Cities     | Publications |
|------------|--------------|
| Wageningen | 26           |
| Malaga     | 20           |
| Cadiz      | 16           |
| Madrid     | 15           |
| Sophia     | 15           |
| Antipolis  | 15           |
| Nantes     | 13           |
| Paris      | 13           |
| Marseille  | 12           |
| Naples     | 12           |
| Seville    | 12           |
| Lisbon     | 10           |
| Kiel       | 9            |
| Pisa       | 9            |
| Foggia     | 8            |
| Le Mans    | 8            |

i.

| Emerging concepts        | GF |
|--------------------------|----|
| Ag                       | 3  |
| Membrane filtration      | 3  |
| Pilot scale              | 3  |
| Raceway                  | 3  |
| Aff                      | 2  |
| Algal pond               | 2  |
| Algal productivity       | 2  |
| Algal productivity model | 2  |
| Bioactivity              | 2  |
| Biomass concentration    | 2  |
| Cell disruption          | 2  |
| Cheaper                  | 2  |
| Combine diet             | 2  |
| Dry sample               | 2  |
| Dynamic filtration       | 2  |
| Elongase                 | 2  |
| Eventually               | 2  |
| Explosion                | 2  |
| Final concentration      | 2  |
| Food supplement          | 2  |

j.

| Journals and number of publications                | IF    | Publications |
|----------------------------------------------------|-------|--------------|
| BIORESOURCE TECHNOLOGY                             | 6,669 | 25           |
| JOURNAL OF APPLIED PHYCOLOGY                       | 2,635 | 22           |
| AQUACULTURE                                        | 3,022 | 11           |
| Algal Research-Biomass Biofuels and Bioproducts    | 3,723 | 11           |
| BIOTECHNOLOGY AND BIOENGINEERING                   | 4,26  | 9            |
| MARINE BIOLOGY                                     | 2,134 | 8            |
| Marine Drugs                                       | 3,772 | 8            |
| SCIENCE OF THE TOTAL ENVIRONMENT                   | 5,589 | 7            |
| APPLIED MICROBIOLOGY AND BIOTECHNOLOGY             | 3,67  | 7            |
| AQUATIC TOXICOLOGY                                 | 3,794 | 7            |
| JOURNAL OF EXPERIMENTAL MARINE BIOLOGY AND ECOLOGY | 2,365 | 7            |
| EUROPEAN JOURNAL OF PHYCOLOGY                      | 2,526 | 7            |
| JOURNAL OF BIOTECHNOLOGY                           | 3,163 | 6            |
| BIOMOLECULAR ENGINEERING                           | -     | 6            |
| LIMNOLOGY AND OCEANOGRAPHY                         | 4,325 | 6            |

k.

| Title of publications                                                                                                                        | Citations | Date |
|----------------------------------------------------------------------------------------------------------------------------------------------|-----------|------|
| Microalgae as a raw material for biofuels production                                                                                         | 727       | 2009 |
| Outdoor cultivation of microalgae for carotenoid production: Current state and perspectives                                                  | 355       | 2007 |
| Microalgae as substrates for fermentative biogas production in a combined biorefinery concept                                                | 332       | 2010 |
| Microorganisms and microalgae as sources of pigments for food use: A scientific oddity or an industrial reality?                             | 280       | 2005 |
| Supercritical carbon dioxide extraction of compounds with pharmaceutical importance from microalgae                                          | 271       | 2003 |
| Potential carbon dioxide fixation by industrially important microalgae                                                                       | 239       | 2010 |
| Transport and degradation of phytoplankton in permeable sediment                                                                             | 229       | 2000 |
| Carotenoid content of chlorophycean microalgae: factors determining lutein accumulation in <i>Muriellopsis</i> sp. (Chlorophyta)             | 157       | 2000 |
| Inhibitory effects of silver nanoparticles in two green algae, <i>Chlorella vulgaris</i> and <i>Dunaliella tertiolecta</i>                   | 156       | 2012 |
| Production of <i>Dunaliella salina</i> biomass rich in 9-cis-beta-carotene and lutein in a closed tubular photobioreactor                    | 141       | 2005 |
| Dissolved esterase activity as a tracer of phytoplankton lysis: Evidence of high phytoplankton lysis rates in the northwestern Mediterranean | 141       | 1998 |
| Comparison of supercritical fluid and ultrasound-assisted extraction of carotenoids and chlorophyll a from <i>Dunaliella salina</i>          | 127       | 2009 |
| Study on the microalgal pigments extraction process: Performance of microwave assisted extraction                                            | 123       | 2011 |
| Milking of microalgae                                                                                                                        | 114       | 2004 |
| Cell fragility - The key problem of microalgae mass production in closed photobioreactors                                                    | 114       | 1991 |

**S5.** Bibliometric overview of the research on *Dunaliella* sp. in 405 European scientific papers. Main concepts (a), concepts network (b), annual production (c), global collaborations (d), European collaborations (e), annual production by countries (f), main countries (g), main cities (h), emerging concepts (i), main journals (j) and main citations (k).



d.

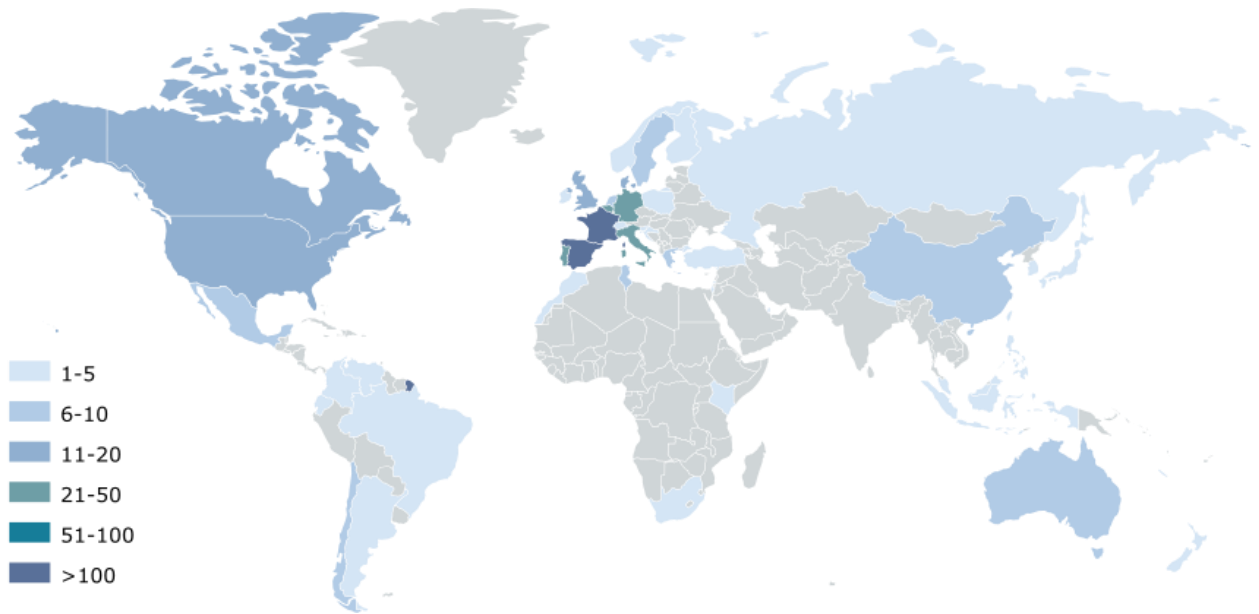

e.

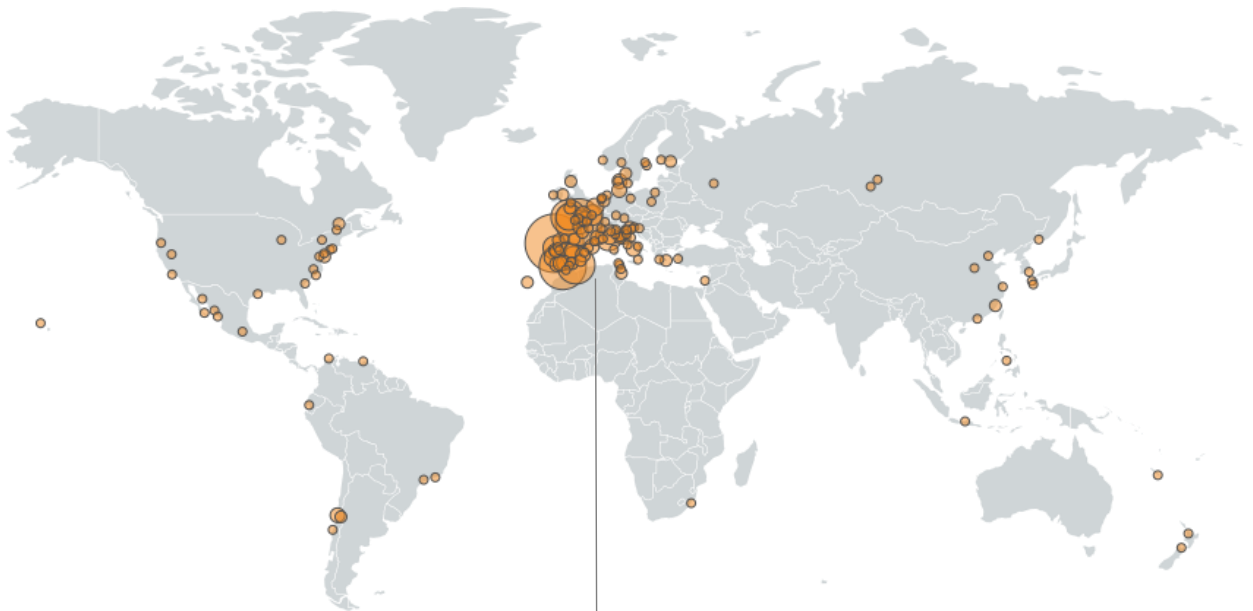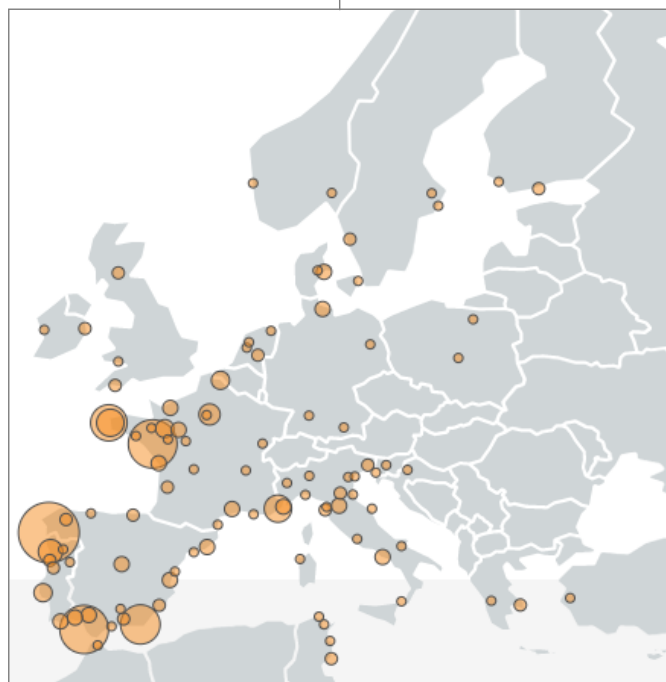

f.

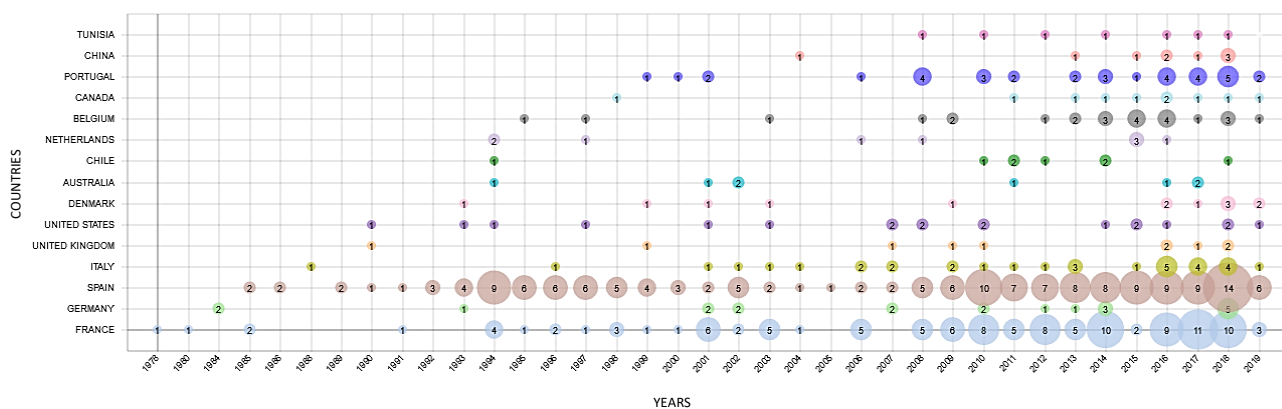

g.

| Countries      | Publications |
|----------------|--------------|
| SPAIN          | 167          |
| FRANCE         | 119          |
| PORTUGAL       | 35           |
| ITALY          | 33           |
| BELGIUM        | 25           |
| GERMANY        | 21           |
| UNITED STATES  | 19           |
| DENMARK        | 13           |
| CANADA         | 10           |
| UNITED KINGDOM | 10           |
| CHINA          | 9            |
| NETHERLANDS    | 9            |
| AUSTRALIA      | 8            |
| CHILE          | 8            |
| TUNISIA        | 7            |

h.

| Cities    | Publications |
|-----------|--------------|
| Vigo      | 43           |
| Nantes    | 34           |
| Cadiz     | 33           |
| Almeria   | 26           |
| Plouzane  | 22           |
| Brest     | 17           |
| Sophia    | 15           |
| Antipolis | 15           |
| Porto     | 13           |
| Paris     | 10           |
| Laval     | 9            |
| Lisbon    | 9            |
| Lille     | 8            |
| Barcelona | 7            |
| Le Mans   | 7            |
| Faro      | 6            |

i.

| Emerging concepts                  | GF |
|------------------------------------|----|
| <i>Springer nature</i>             | 10 |
| <i>Almeriensis</i>                 | 4  |
| <i>Blend</i>                       | 4  |
| <i>Isolipidic</i>                  | 4  |
| <i>Microalga tisochrysis lutea</i> | 4  |
| <i>Aminopeptidase</i>              | 3  |
| <i>Anti inflammatory</i>           | 3  |
| <i>Functionality</i>               | 3  |
| <i>Germany</i>                     | 3  |
| <i>Oxidative stress</i>            | 3  |
| <i>Pesticide</i>                   | 3  |
| <i>Potential effect</i>            | 3  |
| <i>Protease</i>                    | 3  |
| <i>Scale production</i>            | 3  |
| <i>Scenedesmus almeriensis</i>     | 3  |
| <i>Senegalensis</i>                | 3  |
| <i>Senegalese</i>                  | 3  |
| <i>Solea</i>                       | 3  |
| <i>Solea senegalensis</i>          | 3  |
| <i>Springer verlag gmbh</i>        | 3  |

j.

| Journals and number of publications                | IF    | Publications |
|----------------------------------------------------|-------|--------------|
| AQUACULTURE                                        | 3,022 | 52           |
| JOURNAL OF APPLIED PHYCOLOGY                       | 2,635 | 27           |
| Algal Research-Biomass Biofuels and Bioproducts    | 3,723 | 19           |
| AQUACULTURE RESEARCH                               | 1,502 | 15           |
| JOURNAL OF EXPERIMENTAL MARINE BIOLOGY AND ECOLOGY | 2,365 | 13           |
| MARINE BIOLOGY                                     | 2,134 | 11           |
| AQUACULTURE INTERNATIONAL                          | 1,455 | 9            |
| MARINE ECOLOGY PROGRESS SERIES                     | 2,359 | 8            |
| CHEMOSPHERE                                        | 5,108 | 7            |
| ECOTOXICOLOGY AND ENVIRONMENTAL SAFETY             | 4,527 | 7            |
| JOURNAL OF PHYCOLOGY                               | 2,831 | 7            |
| JOURNAL OF PLANKTON RESEARCH                       | 2,209 | 6            |
| BIORESOURCE TECHNOLOGY                             | 6,669 | 6            |
| PHYTOCHEMISTRY                                     | 2,905 | 6            |
| SCIENCE OF THE TOTAL ENVIRONMENT                   | 5,589 | 5            |

k.

| Title of publications                                                                                                                                                    | Citations | Date |
|--------------------------------------------------------------------------------------------------------------------------------------------------------------------------|-----------|------|
| Biomass production and variation in the biochemical profile (total protein, carbohydrates, RNA, lipids and fatty acids) of seven species of marine microalgae            | 190       | 1989 |
| Effects of nitrogen source and growth phase on proximate biochemical composition, lipid classes and fatty acid profile of the marine microalga <i>Isochrysis galbana</i> | 160       | 1998 |
| Antioxidant potential of microalgae in relation to their phenolic and carotenoid content                                                                                 | 119       | 2012 |
| Effects of temperature on photosynthetic parameters and TEP production in eight species of marine microalgae                                                             | 107       | 2008 |
| Comparison between extraction of lipids and fatty acids from microalgal biomass                                                                                          | 106       | 1994 |
| Determination of DPPH radical oxidation caused by methanolic extracts of some microalgal species by linear regression analysis of spectrophotometric measurements        | 103       | 2007 |
| A study on simultaneous photolimitation and photoinhibition in dense microalgal cultures taking into account incident and averaged irradiances                           | 102       | 1996 |
| Comparison of microalgal biomass profiles as novel functional ingredient for food products                                                                               | 95        | 2013 |
| Modelling neutral lipid production by the microalga <i>Isochrysis</i> aff. <i>galbana</i> under nitrogen limitation                                                      | 95        | 2011 |
| Influence of cellular density on determination of EC50 in microalgal growth inhibition tests                                                                             | 94        | 2000 |
| Influence of phytoplankton diet mixtures on microalgae consumption, larval development and settlement of the Pacific oyster <i>Crassostrea gigas</i> (Thunberg)          | 91        | 2006 |
| Toxicity and bioaccumulation of copper and lead in five marine microalgae                                                                                                | 88        | 2009 |
| Iron-mediated effects on nitrate reductase in marine phytoplankton                                                                                                       | 85        | 1994 |
| Estimation of oxygen evolution by marine phytoplankton from measurement of the efficiency of Photosystem II electron flow                                                | 83        | 1997 |
| Concentration and purification of stearidonic, eicosapentaenoic, and docosaheptaenoic acids from cod liver oil and the marine microalga <i>Isochrysis galbana</i>        | 82        | 1995 |

**S6.** Bibliometric overview of the research on *Isochrysis* sp. in 399 European scientific papers. Main concepts (a), concepts network (b), annual production (c), global collaborations (d), European collaborations (e), annual production by countries (f), main countries (g), main cities (h), emerging concepts (i), main journals (j) and main citations (k).





d.

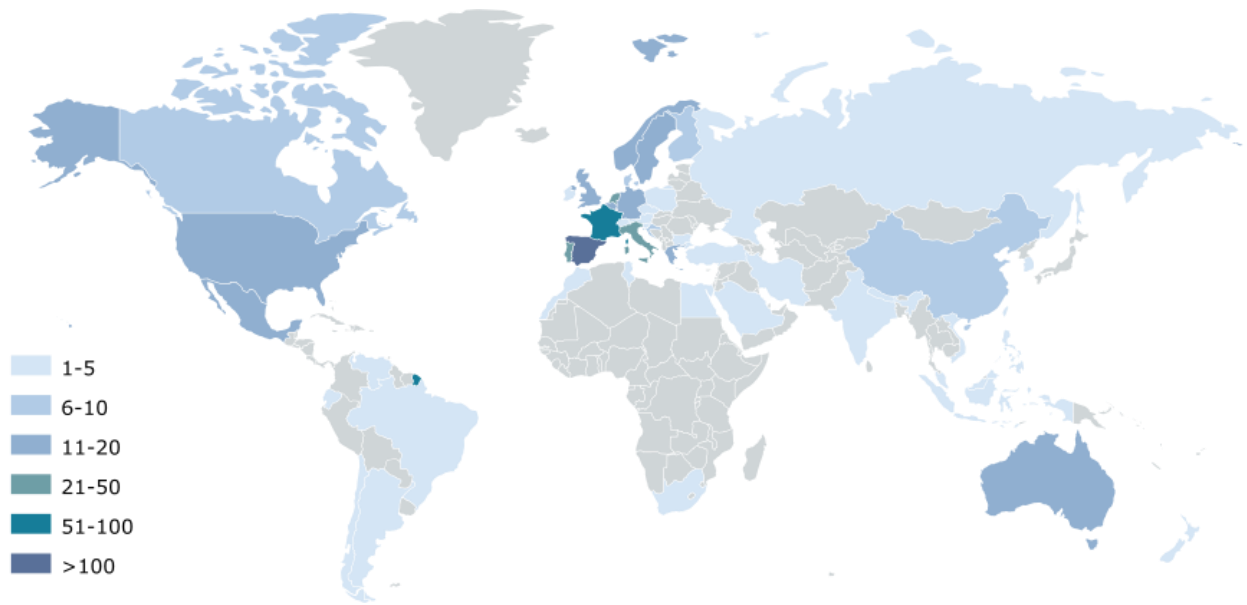

e.

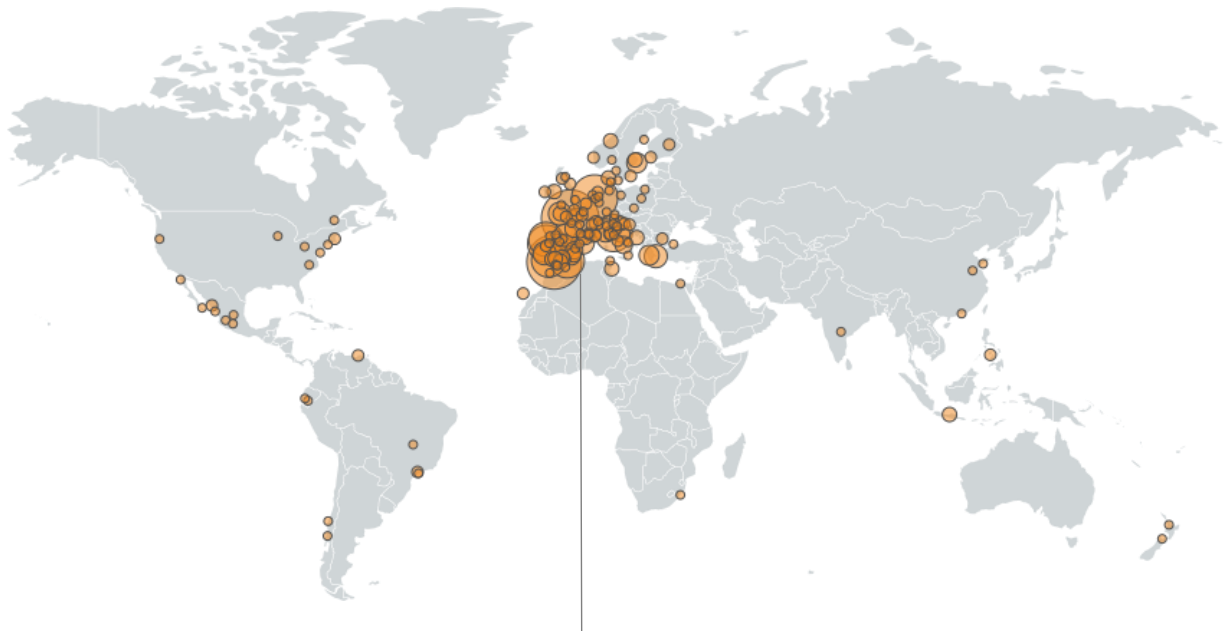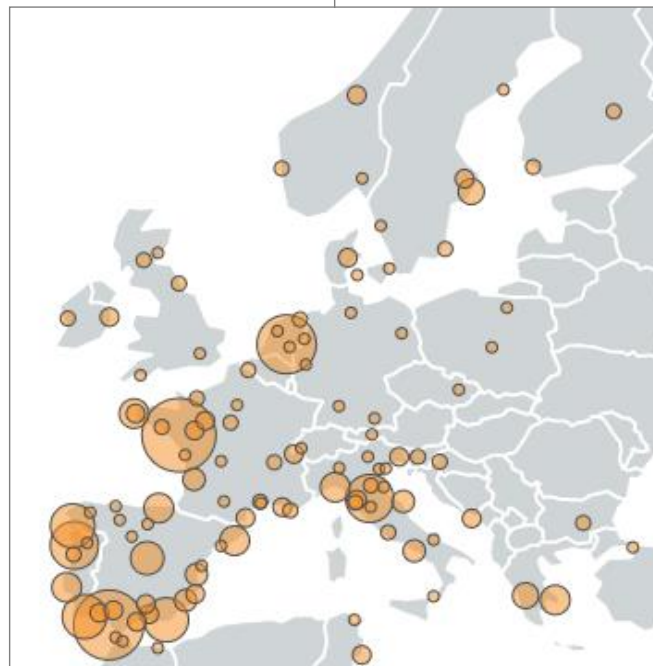

f.

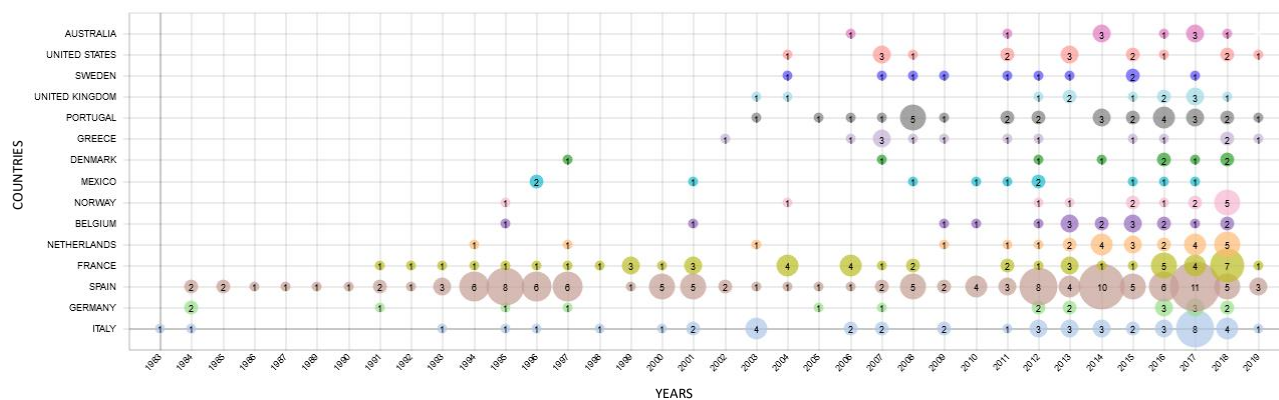

g.

| Countries      | Publications |
|----------------|--------------|
| SPAIN          | 125          |
| FRANCE         | 51           |
| ITALY          | 47           |
| PORTUGAL       | 29           |
| NETHERLANDS    | 26           |
| GERMANY        | 19           |
| BELGIUM        | 18           |
| UNITED STATES  | 16           |
| GREECE         | 14           |
| NORWAY         | 14           |
| UNITED KINGDOM | 12           |
| MEXICO         | 11           |
| AUSTRALIA      | 10           |
| SWEDEN         | 10           |
| DENMARK        | 9            |

h.

| Cities     | Publications |
|------------|--------------|
| Nantes     | 23           |
| Cadiz      | 22           |
| Wageningen | 18           |
| Florence   | 14           |
| Porto      | 14           |
| Almeria    | 13           |
| Vigo       | 13           |
| Faro       | 12           |
| Madrid     | 9            |
| Athens     | 8            |
| Barcelona  | 8            |
| Lisbon     | 8            |
| Bilbao     | 7            |
| Genova     | 7            |
| Plouzane   | 7            |

i.

| Emerging concepts                   | GF |
|-------------------------------------|----|
| <i>Single specy</i>                 | 4  |
| <i>Bass</i>                         | 3  |
| <i>Dicentrarchus labrax</i>         | 3  |
| <i>European sea bass</i>            | 3  |
| <i>Labrax</i>                       | 3  |
| <i>Sea bass</i>                     | 3  |
| <i>Share</i>                        | 3  |
| <i>Alkaline phosphatase</i>         | 2  |
| <i>Anthropogenic</i>                | 2  |
| <i>Associate bacteria</i>           | 2  |
| <i>Bacterial community</i>          | 2  |
| <i>Biotechnological application</i> | 2  |
| <i>Blend</i>                        | 2  |
| <i>Call</i>                         | 2  |
| <i>Chlorella sorokiniana</i>        | 2  |
| <i>Co 2</i>                         | 2  |
| <i>Co2 enrichment</i>               | 2  |
| <i>Co2 injection</i>                | 2  |
| <i>Complete diet</i>                | 2  |
| <i>Consecutive</i>                  | 2  |

j.

| Journals and number of publications                | IF    | Publications |
|----------------------------------------------------|-------|--------------|
| AQUACULTURE                                        | 3,022 | 35           |
| JOURNAL OF APPLIED PHYCOLOGY                       | 2,635 | 28           |
| BIORESOURCE TECHNOLOGY                             | 6,669 | 18           |
| AQUACULTURE RESEARCH                               | 1,502 | 11           |
| JOURNAL OF EXPERIMENTAL MARINE BIOLOGY AND ECOLOGY | 2,365 | 10           |
| Algal Research-Biomass Biofuels and Bioproducts    | 3,723 | 9            |
| JOURNAL OF PLANKTON RESEARCH                       | 2,209 | 6            |
| AQUATIC TOXICOLOGY                                 | 3,794 | 6            |
| AQUACULTURAL ENGINEERING                           | 2,143 | 5            |
| CHEMOSPHERE                                        | 5,108 | 5            |
| ECOTOXICOLOGY AND ENVIRONMENTAL SAFETY             | 4,527 | 4            |
| APPLIED MICROBIOLOGY AND BIOTECHNOLOGY             | 3,67  | 4            |
| CHEMISTRY AND ECOLOGY                              | 1,214 | 4            |
| AQUACULTURE INTERNATIONAL                          | 1,455 | 4            |
| AQUACULTURE NUTRITION                              | 2,098 | 4            |

k.

| Title of publications                                                                                                                                         | Citations | Date |
|---------------------------------------------------------------------------------------------------------------------------------------------------------------|-----------|------|
| Production of microalgal concentrates by flocculation and their assessment as aquaculture feeds                                                               | 195       | 2006 |
| Biomass production and variation in the biochemical profile (total protein, carbohydrates, RNA, lipids and fatty acids) of seven species of marine microalgae | 190       | 1989 |
| Productivity and photosynthetic efficiency of outdoor cultures of <i>Tetraselmis suecica</i> in annular columns                                               | 137       | 2006 |
| Oil production by the marine microalgae <i>Nannochloropsis</i> sp. F&M-M24 and <i>Tetraselmis suecica</i> F&M-M33                                             | 130       | 2012 |
| Antioxidant potential of microalgae in relation to their phenolic and carotenoid content                                                                      | 119       | 2012 |
| Potential for green microalgae to produce hydrogen, pharmaceuticals and other high value products in a combined process                                       | 113       | 2013 |
| Growth of the marine microalga <i>Tetraselmis suecica</i> in batch cultures with different salinities and nutrient concentrations                             | 101       | 1984 |
| Cadmium removal by living cells of the marine microalga <i>Tetraselmis suecica</i>                                                                            | 96        | 2002 |
| Isolation and characterization of soluble protein from the green microalgae <i>Tetraselmis</i> sp                                                             | 88        | 2011 |
| Toxicity and bioaccumulation of copper and lead in five marine microalgae                                                                                     | 88        | 2009 |
| Iron-mediated effects on nitrate reductase in marine phytoplankton                                                                                            | 85        | 1994 |
| Estimation of oxygen evolution by marine phytoplankton from measurement of the efficiency of Photosystem II electron flow                                     | 83        | 1997 |
| Ratio between autoflocculating and target microalgae affects the energy-efficient harvesting by bio-flocculation                                              | 77        | 2012 |
| Vitamin E (alpha-tocopherol) production by the marine microalgae <i>Dunaliella tertiolecta</i> and <i>Tetraselmis suecica</i> in batch cultivation            | 75        | 2003 |
| Growth inhibition of cultured marine phytoplankton by toxic algal-derived polyunsaturated aldehydes                                                           | 74        | 2007 |

**S7.** Bibliometric overview of the research on *Tetraselmis* sp. in 333 European scientific papers. Main concepts (a), concepts network (b), annual production (c), global collaborations (d), European collaborations (e), annual production by countries (f), main countries (g), main cities (h), emerging concepts (i), main journals (j) and main citations (k).



d.

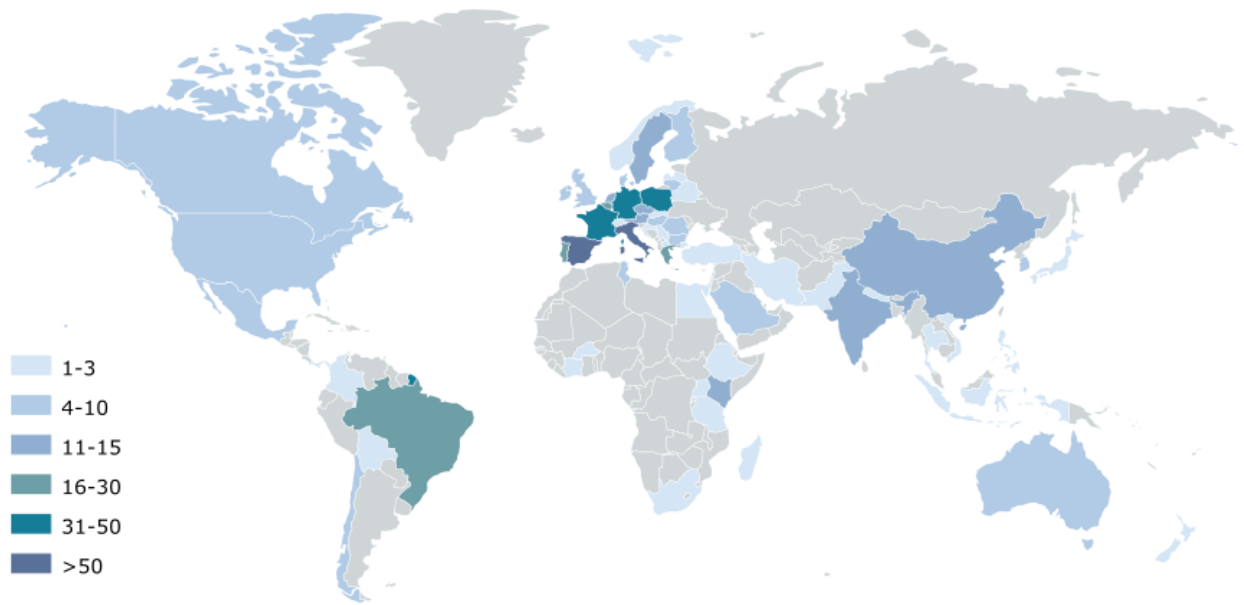

e.

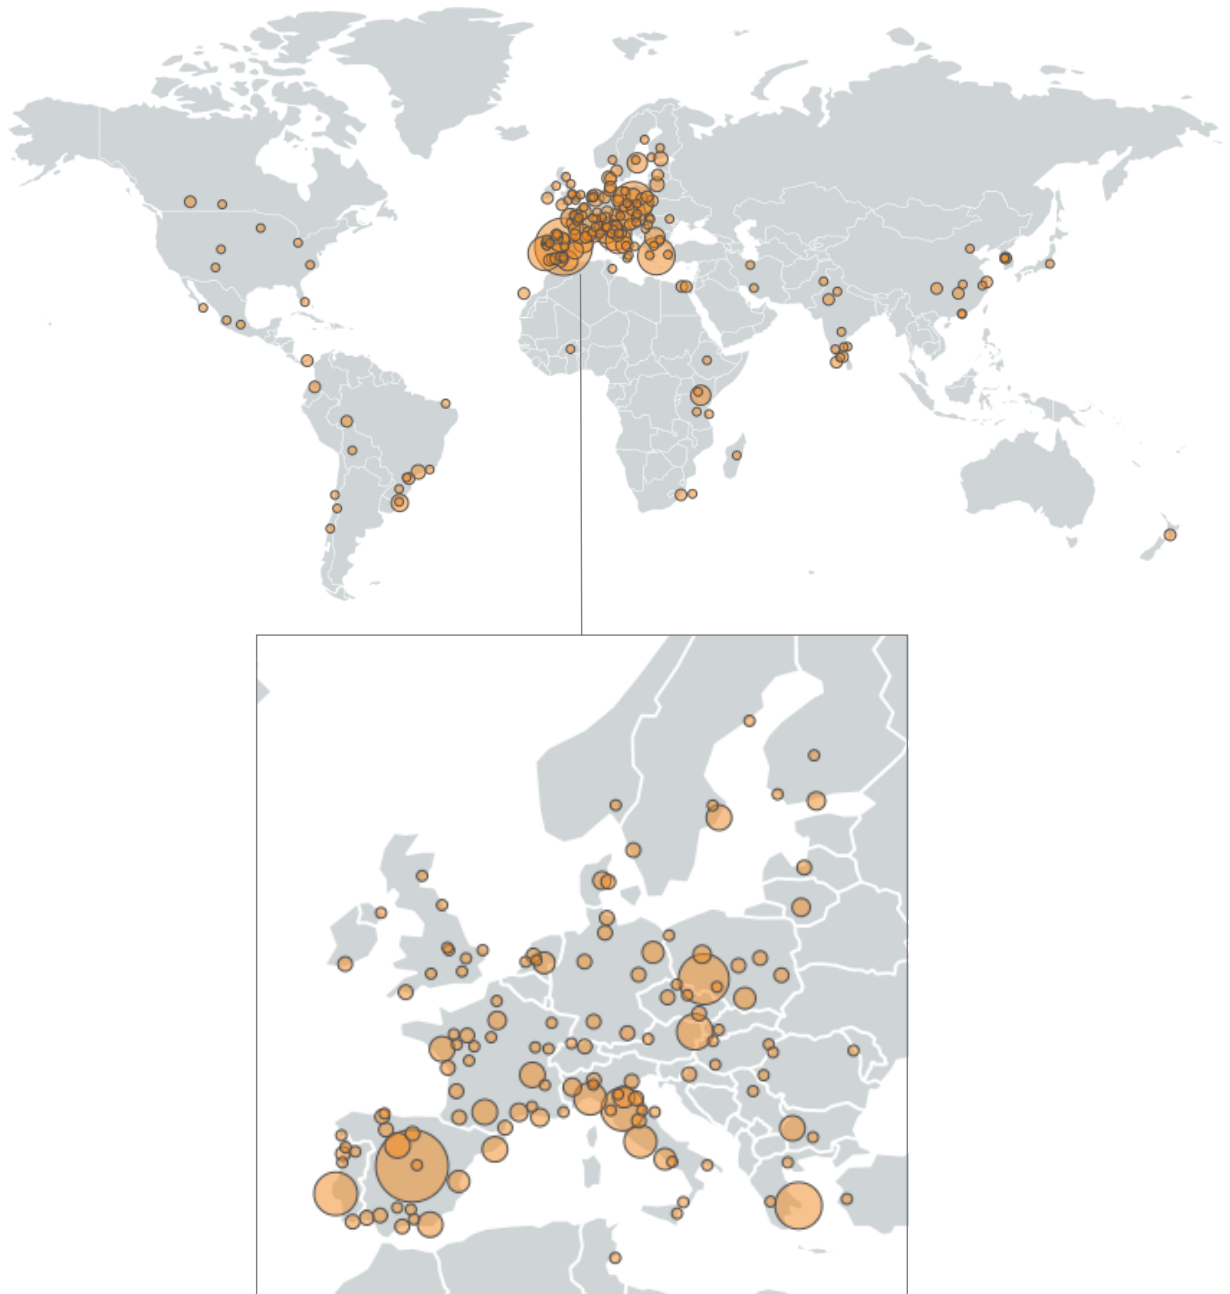

f.

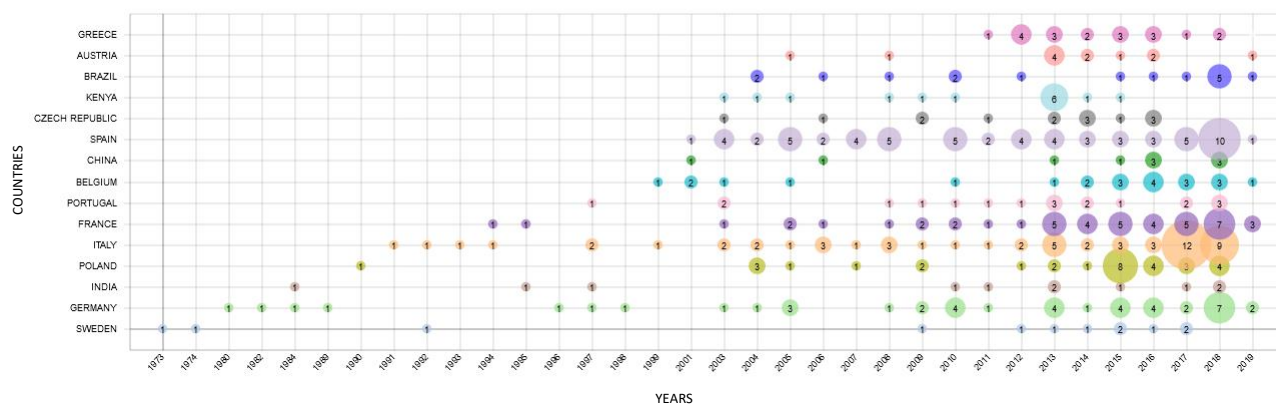

g.

| Countries      | Publications |
|----------------|--------------|
| SPAIN          | 63           |
| ITALY          | 58           |
| FRANCE         | 46           |
| GERMANY        | 44           |
| POLAND         | 31           |
| BELGIUM        | 23           |
| GREECE         | 19           |
| PORTUGAL       | 19           |
| BRAZIL         | 16           |
| CZECH REPUBLIC | 14           |
| KENYA          | 14           |
| AUSTRIA        | 12           |
| SWEDEN         | 12           |
| INDIA          | 11           |
| CHINA          | 10           |

h.

| Cities    | Publications |
|-----------|--------------|
| Madrid    | 25           |
| Wroclaw   | 17           |
| Athens    | 15           |
| Florence  | 14           |
| Lisbon    | 14           |
| Vienna    | 11           |
| Genova    | 10           |
| Rome      | 10           |
| Barcelona | 7            |
| Lyon      | 7            |
| Nairobi   | 7            |
| Nantes    | 7            |
| Stockholm | 7            |
| Almeria   | 6            |
| Sofia     | 6            |

i.

| Emerging concepts                 | GF |
|-----------------------------------|----|
| <i>Springer nature</i>            | 5  |
| <i>Alternative protein</i>        | 4  |
| <i>Alternative protein source</i> | 4  |
| <i>Bean</i>                       | 4  |
| <i>Proximate</i>                  | 4  |
| <i>Soy</i>                        | 4  |
| <i>Stream</i>                     | 4  |
| <i>Substitution</i>               | 4  |
| <i>Biomass cultivation</i>        | 3  |
| <i>Continuous system</i>          | 3  |
| <i>Corn</i>                       | 3  |
| <i>Differential</i>               | 3  |
| <i>Energy return</i>              | 3  |
| <i>Fourier</i>                    | 3  |
| <i>Fourier transform</i>          | 3  |
| <i>Gastrointestinal</i>           | 3  |
| <i>Glycerol</i>                   | 3  |
| <i>Grain</i>                      | 3  |
| <i>Grass</i>                      | 3  |
| <i>Htl</i>                        | 3  |

j.

| Journals and number of publications                | IF    | Publications |
|----------------------------------------------------|-------|--------------|
| BIORESOURCE TECHNOLOGY                             | 6,669 | 28           |
| JOURNAL OF APPLIED PHYCOLOGY                       | 2,635 | 19           |
| Algal Research-Biomass Biofuels and Bioproducts (  | 3,723 | 18           |
| HYDROBIOLOGIA                                      | 2,325 | 7            |
| FOOD CHEMISTRY                                     | 5,399 | 7            |
| JOURNAL OF INDUSTRIAL MICROBIOLOGY & BIOTECHNOLOGY | 2,993 | 5            |
| JOURNAL OF SUPERCRITICAL FLUIDS                    | 3,481 | 4            |
| JOURNAL OF FOOD ENGINEERING                        | 3,625 | 4            |
| Energies                                           | 2,707 | 4            |
| PLoS One                                           | 2,776 | 3            |
| JOURNAL OF ANALYTICAL AND APPLIED PYROLYSIS        | 3,47  | 3            |
| JOURNAL OF AGRICULTURAL AND FOOD CHEMISTRY         | 3,571 | 3            |
| FUEL                                               | 5,128 | 3            |
| ELECTROPHORESIS                                    | 2,754 | 3            |
| ENVIRONMENTAL TECHNOLOGY                           | 1,918 | 3            |

k.

| Title of publications                                                                                                                                                         | Citations | Date |
|-------------------------------------------------------------------------------------------------------------------------------------------------------------------------------|-----------|------|
| Microalgae as a raw material for biofuels production                                                                                                                          | 727       | 2009 |
| Biosorption of Cr <sup>3+</sup> , Cd <sup>2+</sup> and Cu <sup>2+</sup> ions by blue-green algae <i>Spirulina</i> sp.: Kinetics, equilibrium and the mechanism of the process | 366       | 2005 |
| FATTY ACID CONTENT AND CHEMICAL COMPOSITION OF FRESHWATER MICROALGAE                                                                                                          | 338       | 1992 |
| Microalgae as substrates for fermentative biogas production in a combined biorefinery concept                                                                                 | 332       | 2010 |
| Supercritical carbon dioxide extraction of compounds with pharmaceutical importance from microalgae                                                                           | 271       | 2003 |
| Potential carbon dioxide fixation by industrially important microalgae                                                                                                        | 239       | 2010 |
| Protein measurements of microalgal and cyanobacterial biomass                                                                                                                 | 233       | 2010 |
| Antioxidant activity of different fractions of <i>Spirulina platensis</i> protean extract                                                                                     | 229       | 2001 |
| Cultivation of filamentous cyanobacteria (blue-green algae) in agro-industrial wastes and wastewaters: A review                                                               | 220       | 2011 |
| Evaluation of <i>Spirulina</i> sp. growth in photoautotrophic, heterotrophic and mixotrophic cultures                                                                         | 174       | 2004 |
| Nondestructive tracing of migratory rhythms of intertidal benthic microalgae using in vivo chlorophyll a fluorescence                                                         | 160       | 1997 |
| The role of rabbit meat as functional food                                                                                                                                    | 149       | 2011 |
| From open ponds to vertical alveolar panels: the Italian experience in the development of reactors for the mass cultivation of phototrophic microorganisms                    | 148       | 1992 |
| Optimization of accelerated solvent extraction of antioxidants from <i>Spirulina platensis</i> microalga                                                                      | 144       | 2005 |
| A vertical alveolar panel (VAP) for outdoor mass cultivation of microalgae and cyanobacteria                                                                                  | 135       | 1991 |

**S8.** Bibliometric overview of the research on *Arthrospira* sp. in 330 European scientific papers. Main concepts (a), concepts network (b), annual production (c), global collaborations (d), European collaborations (e), annual production by countries (f), main countries (g), main cities (h), emerging concepts (i), main journals (j) and main citations (k).





d.

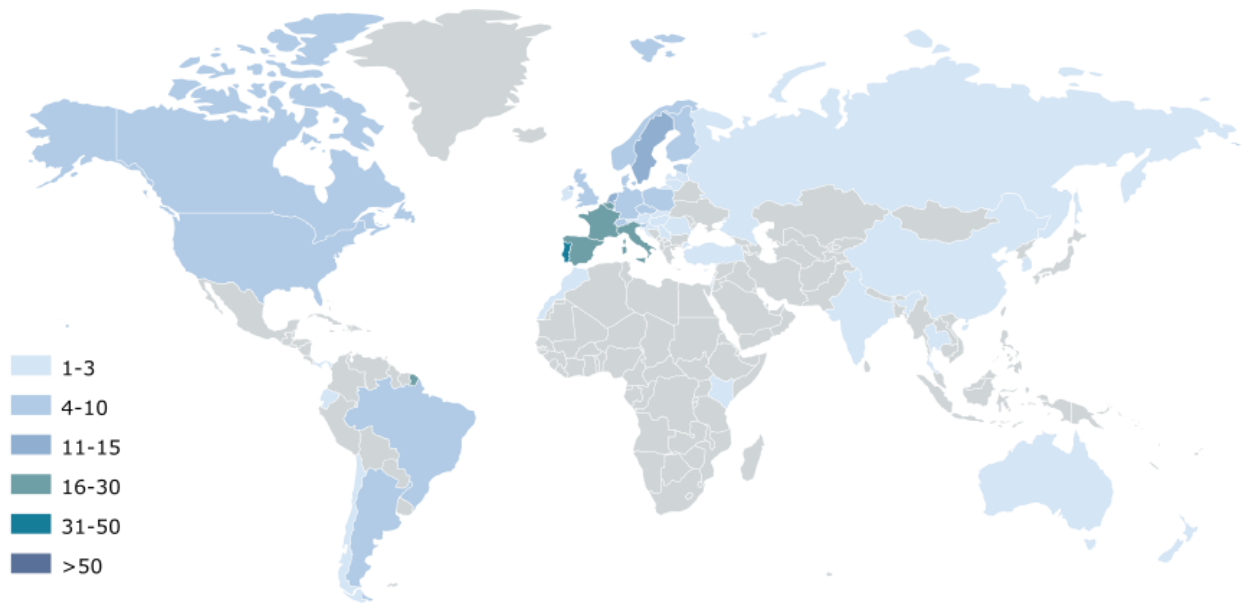

e.

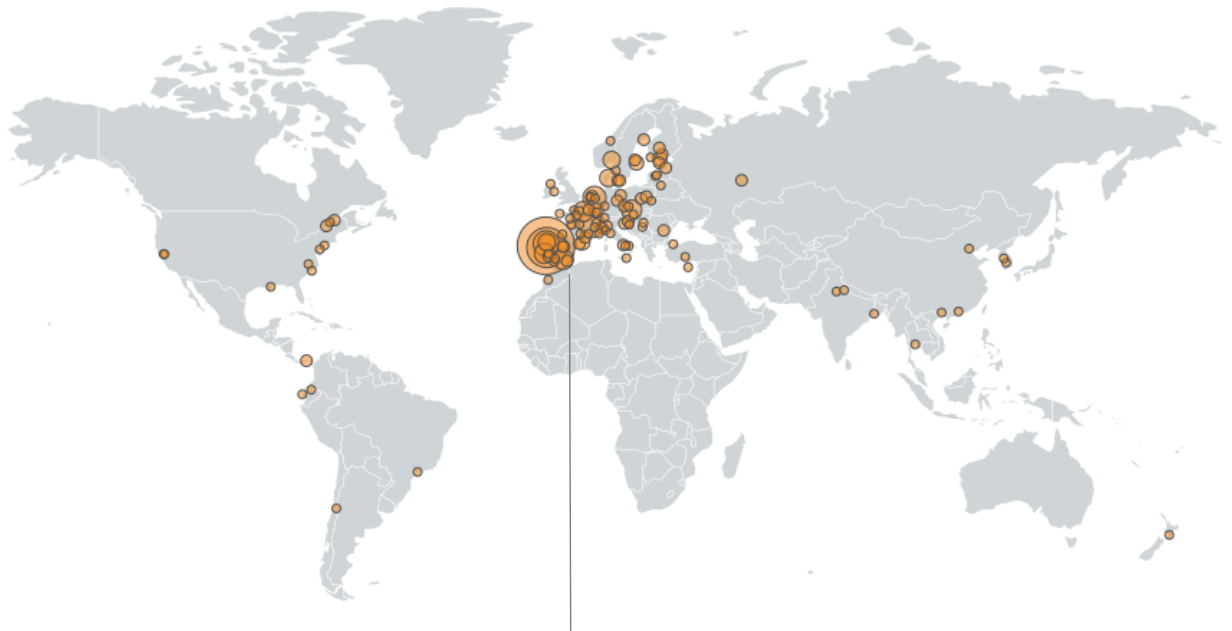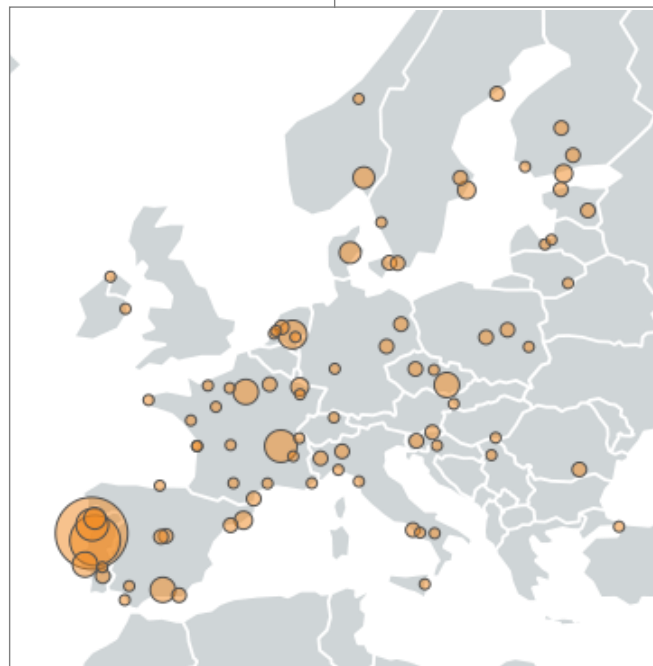

f.

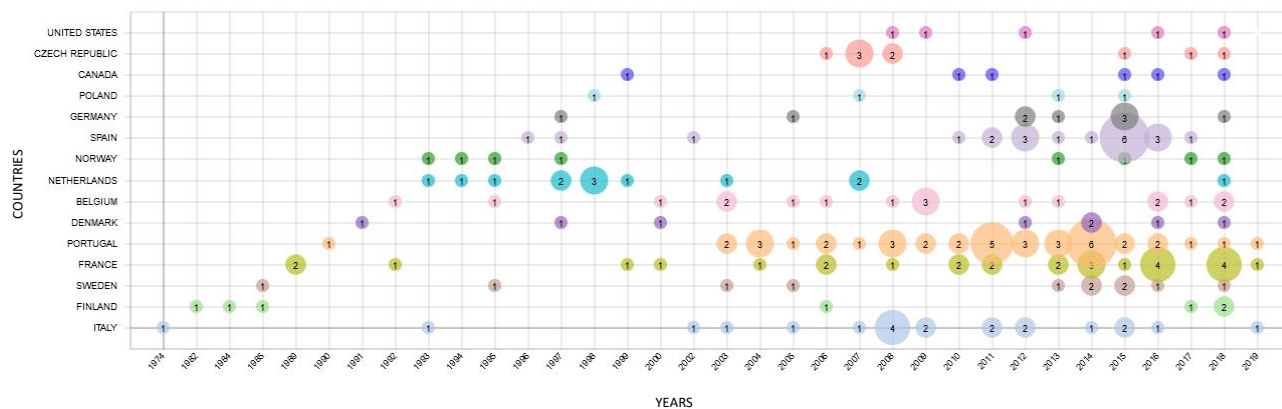

g.

| Countries      | Publications |
|----------------|--------------|
| PORTUGAL       | 41           |
| FRANCE         | 28           |
| ITALY          | 21           |
| SPAIN          | 21           |
| BELGIUM        | 18           |
| NETHERLANDS    | 13           |
| SWEDEN         | 11           |
| CZECH REPUBLIC | 9            |
| GERMANY        | 9            |
| DENMARK        | 8            |
| NORWAY         | 8            |
| FINLAND        | 7            |
| CANADA         | 6            |
| UNITED STATES  | 5            |
| POLAND         | 4            |

h.

| Cities     | Publications |
|------------|--------------|
| Aveiro     | 25           |
| Coimbra    | 16           |
| Lyon       | 9            |
| Porto      | 9            |
| Wageningen | 8            |
| Brno       | 7            |
| Granada    | 7            |
| Lisbon     | 6            |
| Paris      | 6            |
| Braga      | 5            |
| Lyngby     | 5            |
| Oslo       | 5            |
| Barcelona  | 4            |
| Helsinki   | 4            |
| Metz       | 4            |

i.

| Emerging concepts                                           | GF |
|-------------------------------------------------------------|----|
| <i>Biochemical</i>                                          | 3  |
| <i>Freshwater microalga</i>                                 | 3  |
| <i>Additivity</i>                                           | 2  |
| <i>Algal culture</i>                                        | 2  |
| <i>Amend</i>                                                | 2  |
| <i>Biochemical composition</i>                              | 2  |
| <i>Biomass production</i>                                   | 2  |
| <i>Calibrate</i>                                            | 2  |
| <i>Dha</i>                                                  | 2  |
| <i>Ecosar</i>                                               | 2  |
| <i>Euglena</i>                                              | 2  |
| <i>Euglena gracilis</i>                                     | 2  |
| <i>Fate</i>                                                 | 2  |
| <i>Freshwater microalga pseudokirchneriella subcapitata</i> | 2  |
| <i>Friendly</i>                                             | 2  |
| <i>Gracilis</i>                                             | 2  |
| <i>Macrolide</i>                                            | 2  |
| <i>Macrolide antibiotic</i>                                 | 2  |
| <i>Mix algal</i>                                            | 2  |
| <i>Mix algal culture</i>                                    | 2  |

j.

| Journals and number of publications          | IF    | Publications |
|----------------------------------------------|-------|--------------|
| CHEMOSPHERE                                  | 5,108 | 16           |
| ECOTOXICOLOGY AND ENVIRONMENTAL SAFETY       | 4,527 | 12           |
| ENVIRONMENTAL TOXICOLOGY AND CHEMISTRY       | 3,421 | 12           |
| ECOTOXICOLOGY                                | 2,46  | 9            |
| FRESENIUS ENVIRONMENTAL BULLETIN             | 0,691 | 7            |
| SCIENCE OF THE TOTAL ENVIRONMENT             | 5,589 | 7            |
| AQUATIC TOXICOLOGY                           | 3,794 | 6            |
| HYDROBIOLOGIA                                | 2,325 | 5            |
| ENVIRONMENTAL POLLUTION                      | 5,714 | 5            |
| ENVIRONMENTAL SCIENCE AND POLLUTION RESEARCH | 2,914 | 5            |
| JOURNAL OF HAZARDOUS MATERIALS               | 7,65  | 5            |
| ENVIRONMENTAL TOXICOLOGY                     | 2,649 | 5            |
| WATER RESEARCH                               | 7,913 | 5            |
| WATER AIR AND SOIL POLLUTION                 | 1,774 | 4            |
| JOURNAL OF APPLIED PHYCOLOGY                 | 2,635 | 4            |

k.

| Title of publications                                                                                                                           | Citations | Date |
|-------------------------------------------------------------------------------------------------------------------------------------------------|-----------|------|
| Toxicity of nanoparticles of CuO, ZnO and TiO <sub>2</sub> to microalgae <i>Pseudokirchneriella subcapitata</i>                                 | 699       | 2009 |
| Algal toxicity of antibacterial agents used in intensive farming                                                                                | 299       | 2000 |
| Toxicity of five antibiotics and their mixtures towards photosynthetic aquatic organisms: Implications for environmental risk assessment        | 236       | 2013 |
| Altered cell wall morphology in nutrient-deficient phytoplankton and its impact on grazers                                                      | 183       | 1997 |
| Toxicity evaluation of single and mixed antifouling biocides measured with acute toxicity bioassays                                             | 170       | 2002 |
| Comparative use of bacterial, algal and protozoan tests to study toxicity of azo- and anthraquinone dyes                                        | 161       | 2006 |
| Degradation of diclofenac by TiO <sub>2</sub> photocatalysis: UV absorbance kinetics and process evaluation through a set of toxicity bioassays | 157       | 2009 |
| Combined exposure to hydrogen peroxide and light-selective effects on cyanobacteria, green algae, and diatoms                                   | 135       | 2007 |
| Grazing resistance in nutrient-stressed phytoplankton                                                                                           | 125       | 1993 |
| Designing ionic liquids: The chemical structure role in the toxicity                                                                            | 113       | 2013 |
| Potential for green microalgae to produce hydrogen, pharmaceuticals and other high value products in a combined process                         | 113       | 2013 |
| Biochar properties regarding to contaminants content and ecotoxicological assessment                                                            | 110       | 2013 |
| Toxicity evaluation of three pesticides on non-target aquatic and soil organisms: Commercial formulation versus active ingredient               | 107       | 2009 |
| Physicochemical characterization and ecotoxicological assessment of CeO <sub>2</sub> nanoparticles using two aquatic microorganisms             | 100       | 2011 |
| Differential sensitivity of green algae to allelopathic substances from Chara                                                                   | 100       | 2003 |

**S9.** Bibliometric overview of the research on *Selenastrum* sp. in 186 European scientific papers. Main concepts (a), concepts network (b), annual production (c), global collaborations (d), European collaborations (e), annual production by countries (f), main countries (g), main cities (h), emerging concepts (i), main journals (j) and main citations (k).



d.

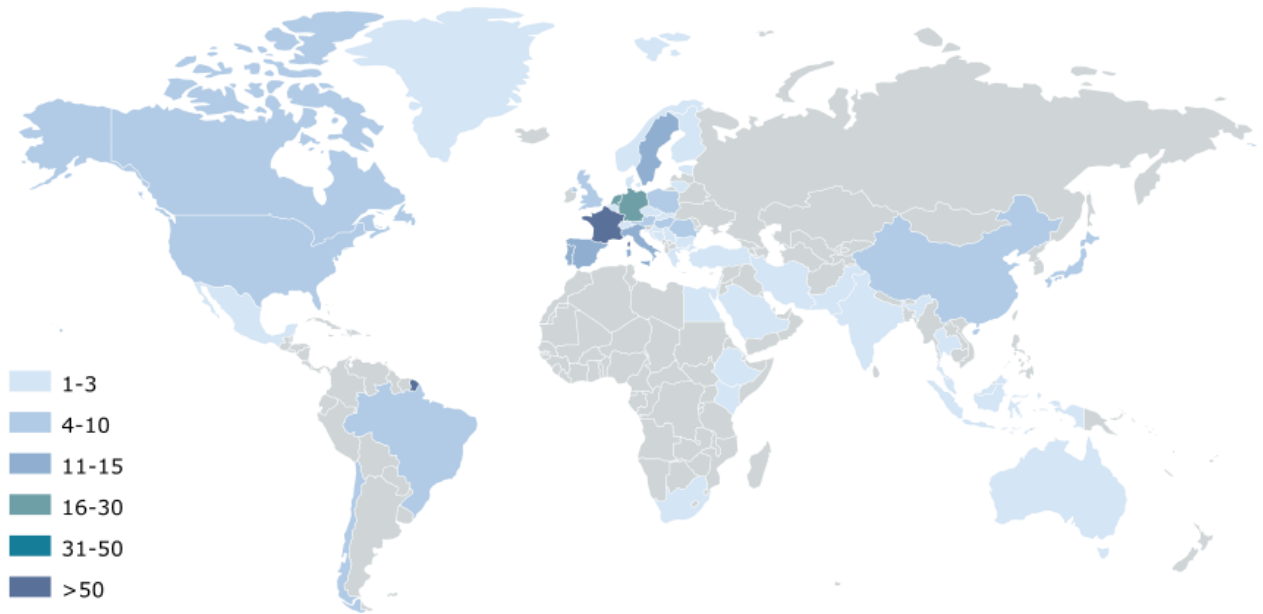

e.

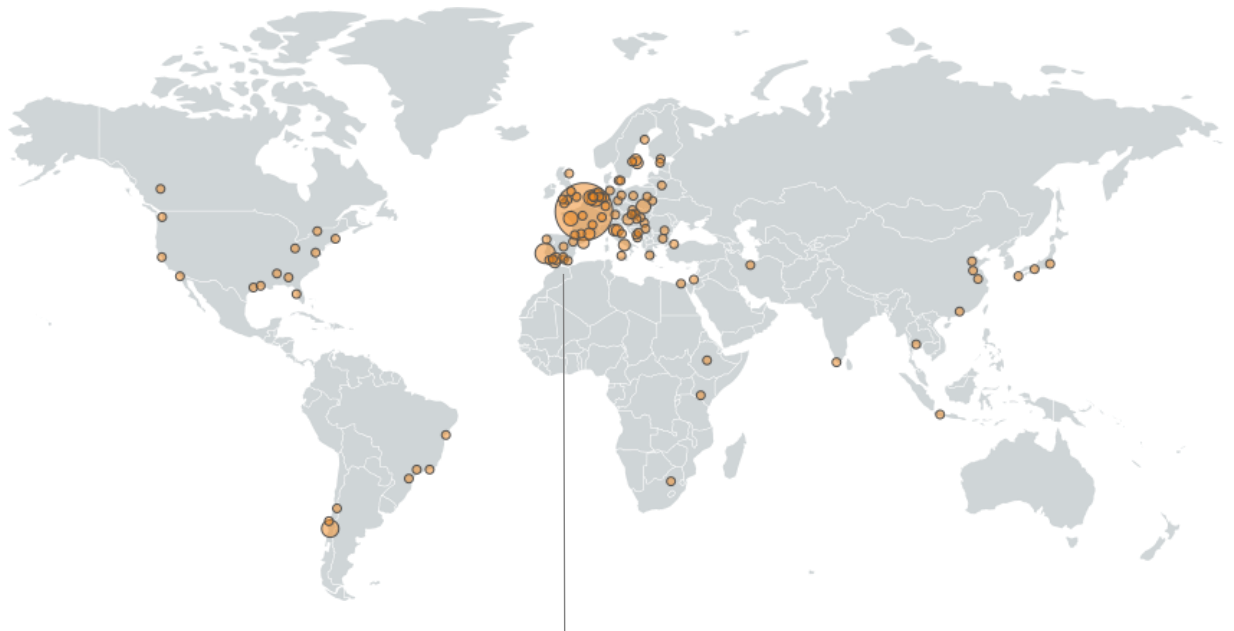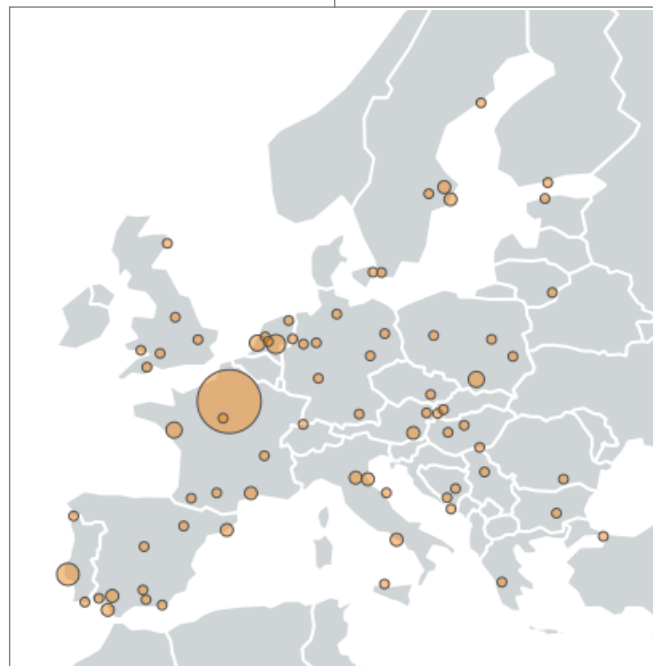

f.

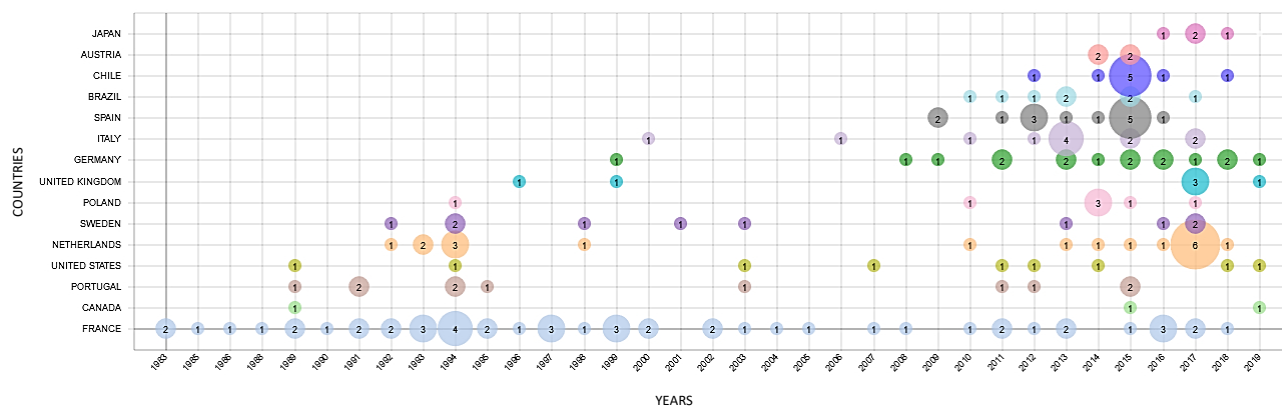

g.

| Countries      | Publications |
|----------------|--------------|
| FRANCE         | 51           |
| NETHERLANDS    | 19           |
| GERMANY        | 16           |
| SPAIN          | 14           |
| ITALY          | 12           |
| PORTUGAL       | 11           |
| SWEDEN         | 10           |
| CHILE          | 9            |
| UNITED STATES  | 9            |
| BRAZIL         | 8            |
| POLAND         | 7            |
| UNITED KINGDOM | 6            |
| AUSTRIA        | 4            |
| JAPAN          | 4            |
| CANADA         | 3            |

h.

| Cities      | Publications |
|-------------|--------------|
| Paris       | 38           |
| Lisbon      | 10           |
| Temuco      | 8            |
| Wageningen  | 8            |
| Delft       | 5            |
| Krakow      | 5            |
| Nantes      | 5            |
| Bologna     | 4            |
| Ravenna     | 4            |
| Stockholm   | 4            |
| Barcelona   | 3            |
| Cadiz       | 3            |
| Graz        | 3            |
| Montpellier | 3            |
| Naples      | 3            |

i.

| Emerging concepts             | GF |
|-------------------------------|----|
| <i>Absorption</i>             | 2  |
| <i>Fatty acid composition</i> | 2  |
| <i>Accumulation response</i>  | 1  |
| <i>Adaptive</i>               | 1  |
| <i>Adaptive cell response</i> | 1  |
| <i>Adna</i>                   | 1  |
| <i>Adna sequence</i>          | 1  |
| <i>Algae cultivation</i>      | 1  |
| <i>Algae specy</i>            | 1  |
| <i>Algal system</i>           | 1  |
| <i>Alkaline medium</i>        | 1  |
| <i>Ally</i>                   | 1  |
| <i>Alpha linolenic</i>        | 1  |
| <i>Alpha linolenic acid</i>   | 1  |
| <i>Analize</i>                | 1  |
| <i>Ancient</i>                | 1  |
| <i>Ancient dna</i>            | 1  |
| <i>Aquaculture</i>            | 1  |
| <i>Aquaculture effluent</i>   | 1  |
| <i>Aquaculture production</i> | 1  |

j.

| Journals and number of publications                | IF    | Publications |
|----------------------------------------------------|-------|--------------|
| ORGANIC GEOCHEMISTRY                               | 3,12  | 15           |
| PHYTOCHEMISTRY                                     | 2,905 | 10           |
| JOURNAL OF APPLIED PHYCOLOGY                       | 2,635 | 8            |
| BIORESOURCE TECHNOLOGY                             | 6,669 | 7            |
| Algal Research-Biomass Biofuels and Bioproducts    | 3,723 | 6            |
| APPLIED MICROBIOLOGY AND BIOTECHNOLOGY             | 3,67  | 4            |
| GEOCHIMICA ET COSMOCHIMICA ACTA                    | 4,258 | 4            |
| HYDROBIOLOGIA                                      | 2,325 | 4            |
| PALAEOGEOGRAPHY PALAEOCLIMATOLOGY<br>PALAEOECOLOGY | 2,616 | 3            |
| ENZYME AND MICROBIAL TECHNOLOGY                    | 3,553 | 2            |
| APPLIED ENERGY                                     | 8,426 | 2            |
| FUEL                                               | 5,128 | 2            |
| JOURNAL OF ANALYTICAL AND APPLIED PYROLYSIS        | 3,47  | 2            |
| POLAR BIOLOGY                                      | 2,002 | 2            |
| REVIEW OF PALAEOBOTANY AND PALYNOLOGY              | 1,674 | 2            |

k.

| Title of publications                                                                                                                                                                 | Citations | Date |
|---------------------------------------------------------------------------------------------------------------------------------------------------------------------------------------|-----------|------|
| An outlook on microalgal biofuels                                                                                                                                                     | 1049      | 2010 |
| <i>Botryococcus braunii</i> : A rich source for hydrocarbons and related ether lipids                                                                                                 | 435       | 2005 |
| Supercritical carbon dioxide extraction of compounds with pharmaceutical importance from microalgae                                                                                   | 271       | 2003 |
| Potential carbon dioxide fixation by industrially important microalgae                                                                                                                | 239       | 2010 |
| Glacial-interglacial environmental changes inferred from molecular and compound-specific delta13C analyses of sediments from Sacred Lake, Mt. Kenya                                   | 169       | 1999 |
| Screening of microalgae with potential for biodiesel production and nutrient removal from treated domestic sewage                                                                     | 134       | 2011 |
| Antioxidant potential of microalgae in relation to their phenolic and carotenoid content                                                                                              | 119       | 2012 |
| Potential for green microalgae to produce hydrogen, pharmaceuticals and other high value products in a combined process                                                               | 113       | 2013 |
| Extraction of hydrocarbons from microalga <i>Botryococcus braunii</i> with switchable solvents                                                                                        | 107       | 2010 |
| Raman microspectroscopy of individual algal cells: Sensing unsaturation of storage lipids in vivo                                                                                     | 94        | 2010 |
| Possible algal origin of long chain odd n-alkanes in immature sediments as revealed by distributions and carbon isotope ratios                                                        | 93        | 1994 |
| Phytoplankton dynamics and structure: A comparative analysis in natural and man-made water bodies of different trophic state                                                          | 83        | 2000 |
| Growth of the microalga <i>Botryococcus braunii</i> in secondarily treated sewage                                                                                                     | 75        | 2009 |
| Similar morphological and chemical variations of <i>Gloeocapsomorpha prisca</i> in Ordovician sediments and cultured <i>Botryococcus braunii</i> as a response to changes in salinity | 75        | 1992 |
| A remarkable paradox: Sulfurised freshwater algal ( <i>Botryococcus braunii</i> ) lipids in an ancient hypersaline euxinic ecosystem                                                  | 74        | 1998 |

**S10.** Bibliometric overview of the research on *Botryococcus* sp. in 147 European scientific papers. Main concepts (a), concepts network (b), annual production (c), global collaborations (d), European collaborations (e), annual production by countries (f), main countries (g), main cities (h), emerging concepts (i), main journals (j) and main citations (k).





d.

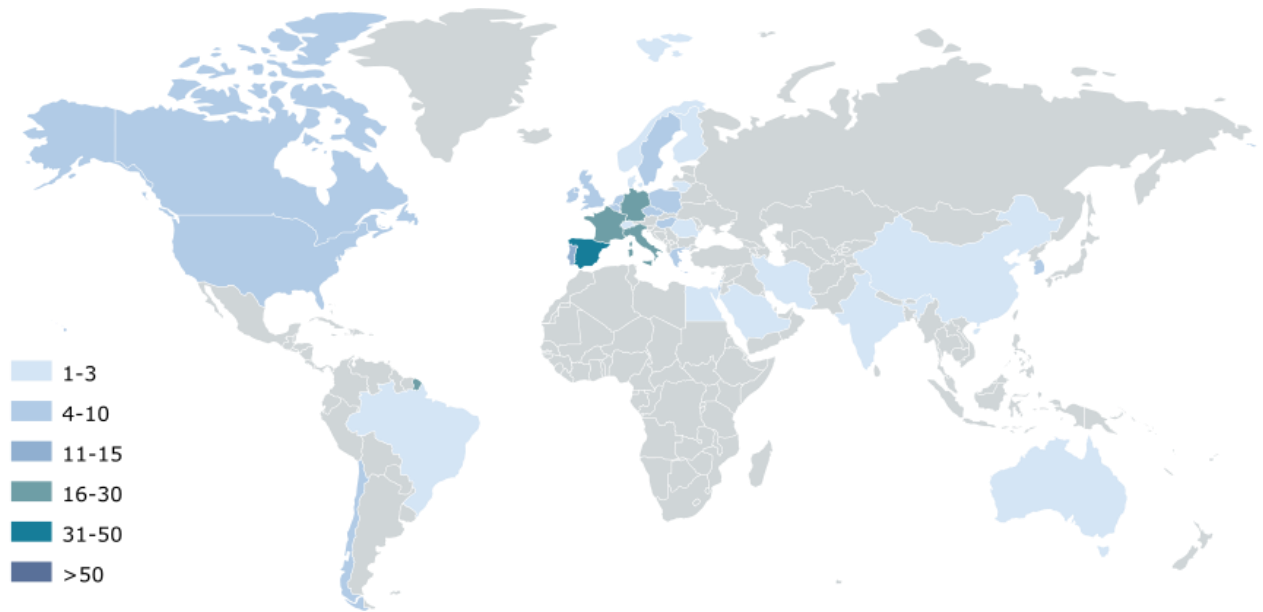

e.

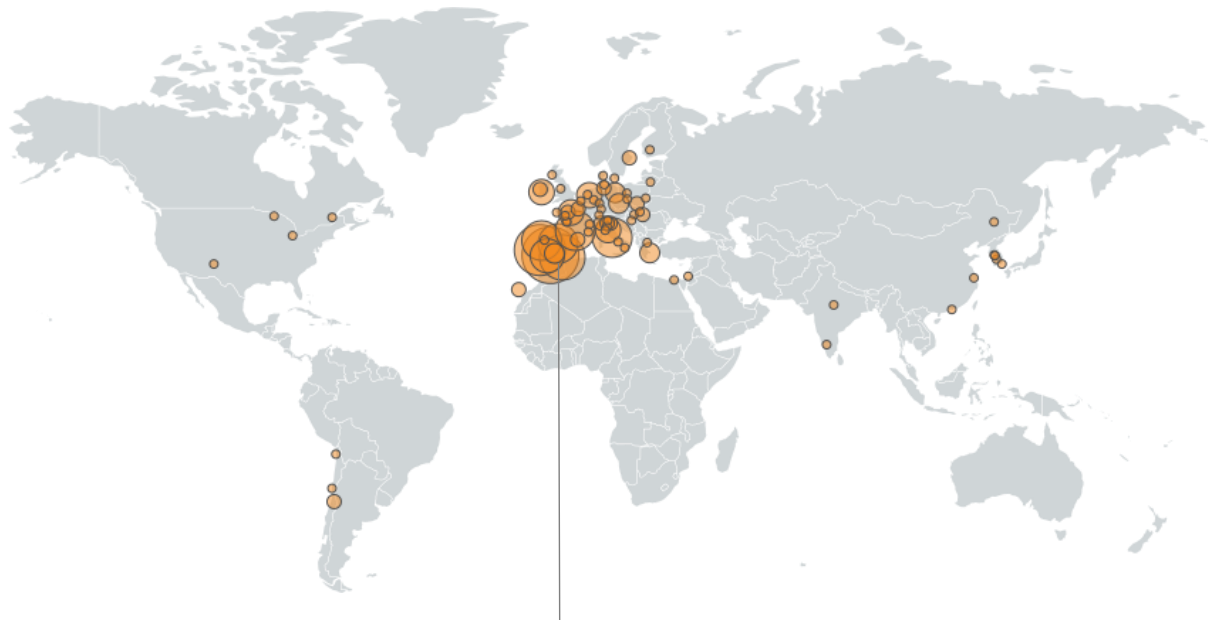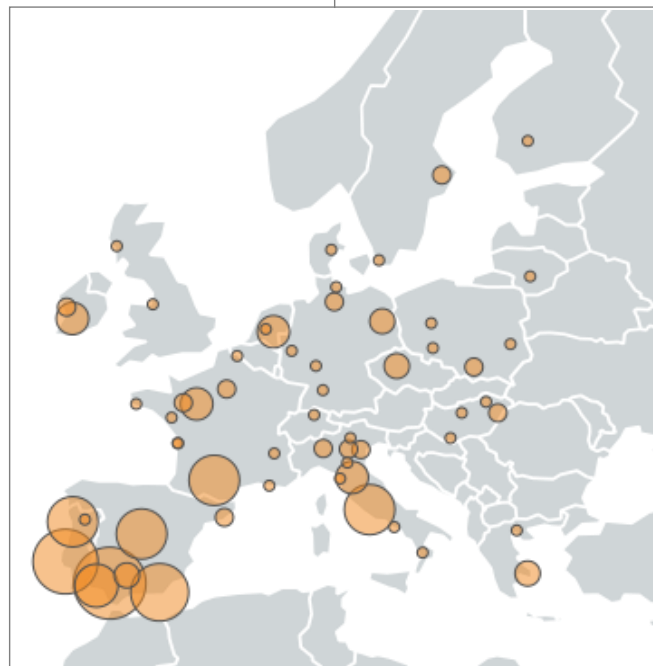

f.

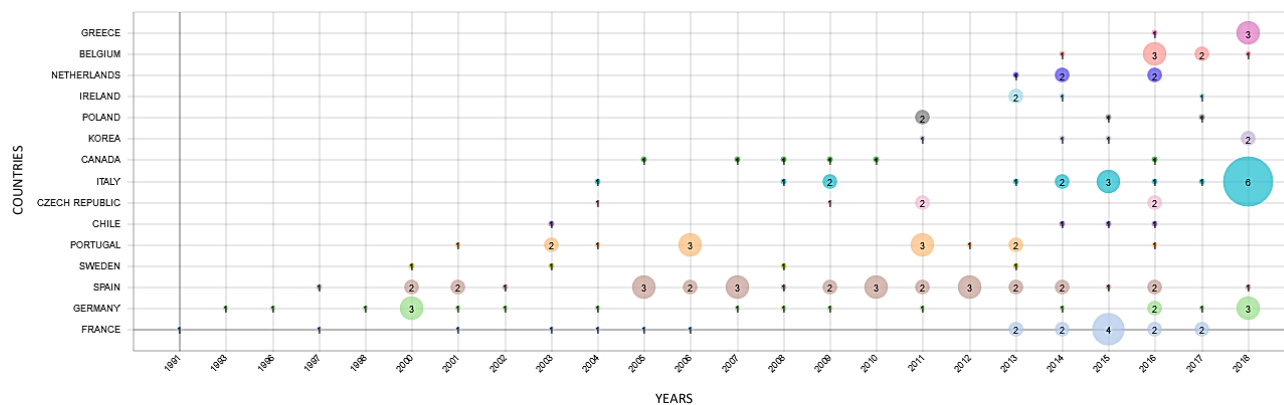

g.

| Countries      | Publications |
|----------------|--------------|
| SPAIN          | 33           |
| GERMANY        | 20           |
| FRANCE         | 19           |
| ITALY          | 18           |
| PORTUGAL       | 14           |
| BELGIUM        | 7            |
| CANADA         | 6            |
| CZECH REPUBLIC | 6            |
| KOREA          | 5            |
| NETHERLANDS    | 5            |
| CHILE          | 4            |
| GREECE         | 4            |
| IRELAND        | 4            |
| POLAND         | 4            |
| SWEDEN         | 4            |

h.

| Cities     | Publications |
|------------|--------------|
| Seville    | 9            |
| Lisbon     | 8            |
| Almeria    | 7            |
| Madrid     | 6            |
| Porto      | 6            |
| Rome       | 6            |
| Toulouse   | 6            |
| Huelva     | 5            |
| Florence   | 4            |
| Le Mans    | 4            |
| Limerick   | 4            |
| Wageningen | 4            |
| Athens     | 3            |
| Berlin     | 3            |
| Cordoba    | 3            |

i.

| Emerging concepts            | GF |
|------------------------------|----|
| <i>Diverse</i>               | 4  |
| <i>Medicine</i>              | 4  |
| <i>Bar</i>                   | 3  |
| <i>Microalgal specy</i>      | 3  |
| <i>Nutraceutic</i>           | 3  |
| <i>Almeriensis</i>           | 2  |
| <i>Aquatic</i>               | 2  |
| <i>Art</i>                   | 2  |
| <i>Bench</i>                 | 2  |
| <i>Bench scale</i>           | 2  |
| <i>Bench scale reactor</i>   | 2  |
| <i>Biofilm</i>               | 2  |
| <i>Carbohydrate</i>          | 2  |
| <i>Carotenoid extraction</i> | 2  |
| <i>Chloroform</i>            | 2  |
| <i>Contaminant</i>           | 2  |
| <i>Contamination</i>         | 2  |
| <i>Crucial</i>               | 2  |
| <i>Deal</i>                  | 2  |
| <i>Delivery</i>              | 2  |

j.

| Journals and number of publications             | IF    | Publications |
|-------------------------------------------------|-------|--------------|
| JOURNAL OF APPLIED PHYCOLOGY                    | 2,635 | 10           |
| Algal Research-Biomass Biofuels and Bioproducts | 3,723 | 10           |
| APPLIED MICROBIOLOGY AND BIOTECHNOLOGY          | 3,67  | 5            |
| Marine Drugs                                    | 3,772 | 5            |
| AQUACULTURE NUTRITION                           | 2,098 | 4            |
| BIOTECHNOLOGY AND BIOENGINEERING                | 4,26  | 3            |
| BIORESOURCE TECHNOLOGY                          | 6,669 | 3            |
| BIOTECHNOLOGY LETTERS                           | 2,154 | 3            |
| JOURNAL OF BIOTECHNOLOGY                        | 3,163 | 3            |
| AQUACULTURE                                     | 3,022 | 2            |
| ANALYTICAL AND BIOANALYTICAL CHEMISTRY          | 3,286 | 2            |
| EUROPEAN FOOD RESEARCH AND TECHNOLOGY           | 2,056 | 2            |
| EUROPEAN JOURNAL OF PHYCOLOGY                   | 2,526 | 2            |
| FOOD CHEMISTRY                                  | 5,399 | 2            |
| JOURNAL OF PHYCOLOGY                            | 2,831 | 2            |

k.

| Title of publications                                                                                                                                                         | Citations | Date |
|-------------------------------------------------------------------------------------------------------------------------------------------------------------------------------|-----------|------|
| Outdoor cultivation of microalgae for carotenoid production: Current state and perspectives                                                                                   | 355       | 2007 |
| Microorganisms and microalgae as sources of pigments for food use: A scientific oddity or an industrial reality?                                                              | 280       | 2005 |
| Carotenoid content of chlorophycean microalgae: factors determining lutein accumulation in <i>Muriellopsis</i> sp. (Chlorophyta)                                              | 157       | 2000 |
| Evaluation of different cell disruption processes on encysted cells of <i>Haematococcus pluvialis</i> : Effects on astaxanthin recovery and implications for bio-availability | 153       | 2001 |
| Microalgae as sources of high added-value compounds-a brief review of recent work                                                                                             | 140       | 2011 |
| Cell fragility - The key problem of microalgae mass production in closed photobioreactors                                                                                     | 114       | 1991 |
| Potential for green microalgae to produce hydrogen, pharmaceuticals and other high value products in a combined process                                                       | 113       | 2013 |
| Astaxanthin-rich algal meal and vitamin C inhibit <i>Helicobacter pylori</i> infection in BALB/cA mice                                                                        | 102       | 2000 |
| Biotechnological production of astaxanthin with <i>Phaffia rhodozyma</i> / <i>Xanthophyllomyces dendrorhous</i>                                                               | 101       | 2011 |
| Optimization of culture medium for the continuous cultivation of the microalga <i>Haematococcus pluvialis</i>                                                                 | 98        | 2000 |
| Comparison of microalgal biomass profiles as novel functional ingredient for food products                                                                                    | 95        | 2013 |
| Colouring ornamental fish ( <i>Cyprinus carpio</i> and <i>Carassius auratus</i> ) with microalgal biomass                                                                     | 87        | 2003 |
| Aqueous extraction of proteins from microalgae: Effect of different cell disruption methods                                                                                   | 84        | 2014 |
| Subcritical water extraction and characterization of bioactive compounds from <i>Haematococcus pluvialis</i> microalga                                                        | 84        | 2010 |
| Analysis and enhancement of astaxanthin accumulation in <i>Haematococcus pluvialis</i>                                                                                        | 79        | 2005 |

**S11.** Bibliometric overview of the research on *Haematococcus* sp. in 129 European scientific papers. Main concepts (a), concepts network (b), annual production (c), global collaborations (d), European collaborations (e), annual production by countries (f), main countries (g), main cities (h), emerging concepts (i), main journals (j) and main citations (k).



d.

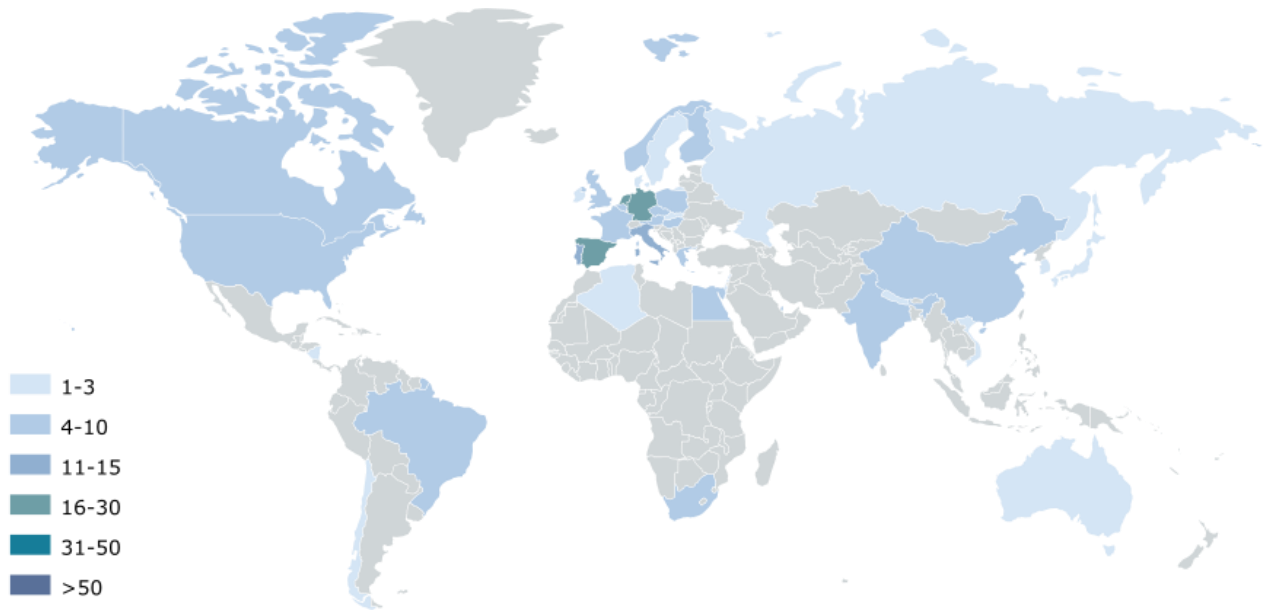

e.

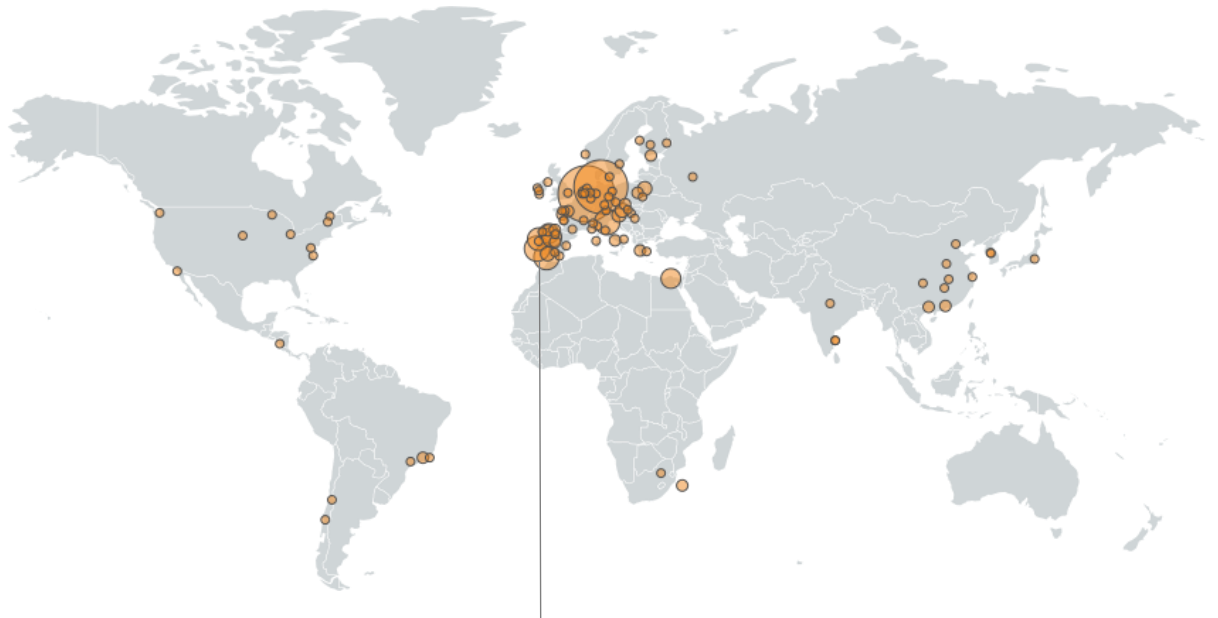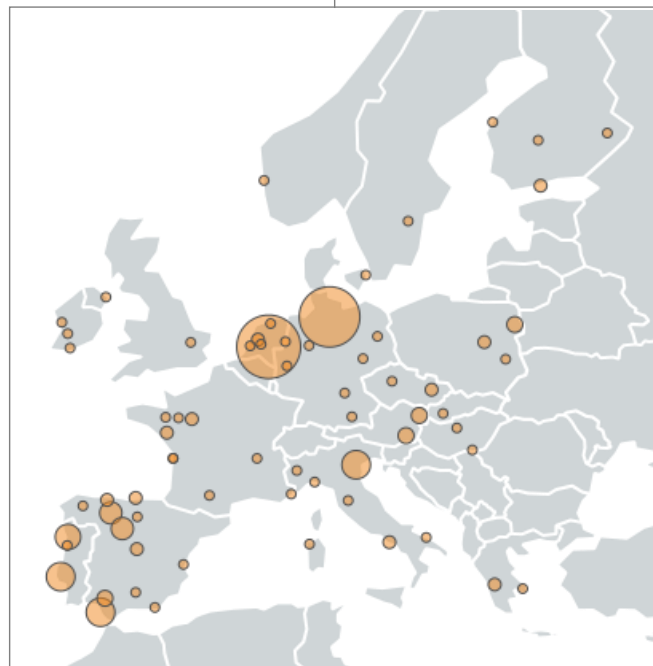

f.

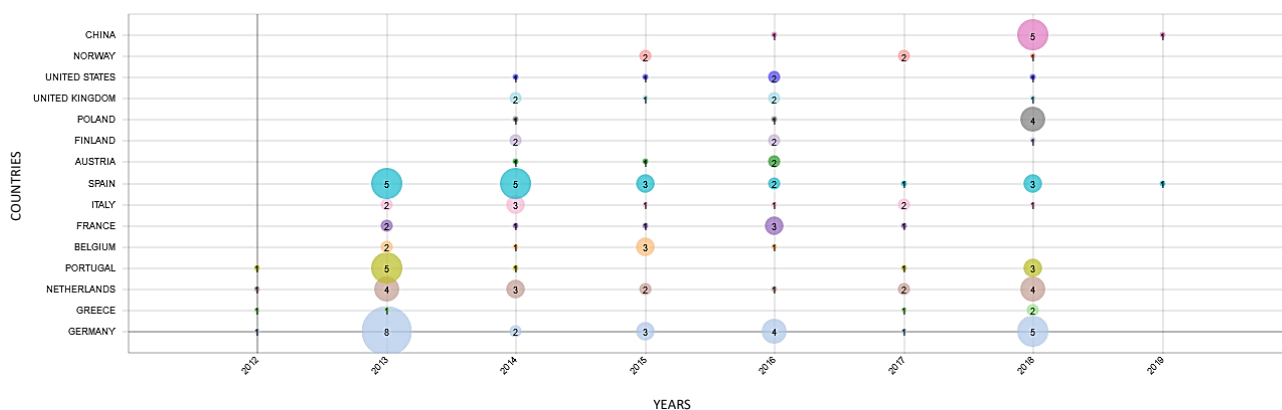

g.

| Countries      | Publications |
|----------------|--------------|
| GERMANY        | 24           |
| SPAIN          | 20           |
| NETHERLANDS    | 17           |
| PORTUGAL       | 11           |
| ITALY          | 10           |
| FRANCE         | 8            |
| BELGIUM        | 7            |
| CHINA          | 7            |
| POLAND         | 6            |
| UNITED KINGDOM | 6            |
| FINLAND        | 5            |
| GREECE         | 5            |
| NORWAY         | 5            |
| UNITED STATES  | 5            |
| AUSTRIA        | 4            |

h.

| Cities     | Publications |
|------------|--------------|
| Wageningen | 15           |
| Hamburg    | 14           |
| Cadiz      | 6            |
| Lisbon     | 6            |
| Padova     | 6            |
| Porto      | 5            |
| Leon       | 4            |
| Tanta      | 4            |
| Valladolid | 4            |
| Bialystok  | 3            |
| Graz       | 3            |
| Seville    | 3            |
| Vienna     | 3            |
| Amsterdam  | 2            |
| Guangzhou  | 2            |

i.

| Emerging concepts           | GF |
|-----------------------------|----|
| <i>Tp</i>                   | 5  |
| <i>Cod</i>                  | 4  |
| <i>Cell number</i>          | 3  |
| <i>Continuous mode</i>      | 3  |
| <i>Dynamic</i>              | 3  |
| <i>Exogenous</i>            | 3  |
| <i>Tn</i>                   | 3  |
| <i>Aeration</i>             | 2  |
| <i>Antibacterial</i>        | 2  |
| <i>Aquatic organism</i>     | 2  |
| <i>Ascorbate</i>            | 2  |
| <i>Ascorbate peroxidase</i> | 2  |
| <i>Auxin</i>                | 2  |
| <i>Batch operation</i>      | 2  |
| <i>Bioaccumulation</i>      | 2  |
| <i>Bioenergy</i>            | 2  |
| <i>Bioremediation</i>       | 2  |
| <i>Breed</i>                | 2  |
| <i>Carotene</i>             | 2  |
| <i>Catalase</i>             | 2  |

j.

| Journals and number of publications             | IF    | Publications |
|-------------------------------------------------|-------|--------------|
| BIORESOURCE TECHNOLOGY                          | 6,669 | 26           |
| WATER RESEARCH                                  | 7,913 | 7            |
| BIOPROCESS AND BIOSYSTEMS ENGINEERING           | 2,371 | 5            |
| Algal Research-Biomass Biofuels and Bioproducts | 3,723 | 5            |
| BIOMASS & BIOENERGY                             | 3,537 | 4            |
| JOURNAL OF APPLIED PHYCOLOGY                    | 2,635 | 4            |
| JOURNAL OF BIOTECHNOLOGY                        | 3,163 | 4            |
| Marine Drugs                                    | 3,772 | 3            |
| PLoS One                                        | 2,776 | 3            |
| AQUATIC TOXICOLOGY                              | 3,794 | 2            |
| APPLIED MICROBIOLOGY AND BIOTECHNOLOGY          | 3,67  | 2            |
| ENVIRONMENTAL SCIENCE & TECHNOLOGY              | 7,149 | 2            |
| FRESHWATER BIOLOGY                              | 3,404 | 2            |
| SCIENCE OF THE TOTAL ENVIRONMENT                | 5,589 | 2            |
| SEPARATION AND PURIFICATION TECHNOLOGY          | 5,107 | 2            |

k.

| Title of publications                                                                                                                                                           | Citations | Date |
|---------------------------------------------------------------------------------------------------------------------------------------------------------------------------------|-----------|------|
| The impact of nitrogen starvation on the dynamics of triacylglycerol accumulation in nine microalgae strains                                                                    | 259       | 2012 |
| Nanoplastic affects growth of <i>S. obliquus</i> and reproduction of <i>D. magna</i>                                                                                            | 148       | 2014 |
| Effect of light intensity, pH, and temperature on triacylglycerol (TAG) accumulation induced by nitrogen starvation in <i>Scenedesmus obliquus</i>                              | 114       | 2013 |
| Anaerobic digestate as substrate for microalgae culture: The role of ammonium concentration on the microalgae productivity                                                      | 79        | 2014 |
| Nitrogen availability influences phosphorus removal in microalgae-based wastewater treatment                                                                                    | 79        | 2015 |
| Capability of different microalgae species for phytoremediation processes: Wastewater tertiary treatment, CO <sub>2</sub> bio-fixation and low cost biofuels production         | 71        | 2014 |
| Performance of a flat panel reactor in the continuous culture of microalgae in urban wastewater: Prediction from a batch experiment                                             | 71        | 2013 |
| Growth of three microalgae strains and nutrient removal from an agro-zootechnical digestate                                                                                     | 65        | 2013 |
| Impacts of microalgae pre-treatments for improved anaerobic digestion: Thermal treatment, thermal hydrolysis, ultrasound and enzymatic hydrolysis                               | 64        | 2014 |
| Microalgal Cultivation in Treating Liquid Digestate from Biogas Systems                                                                                                         | 63        | 2016 |
| Influence of strain-specific parameters on hydrothermal liquefaction of microalgae                                                                                              | 57        | 2013 |
| Highly valuable microalgae: Biochemical and topological aspects                                                                                                                 | 52        | 2013 |
| Superior triacylglycerol (TAG) accumulation in starchless mutants of <i>Scenedesmus obliquus</i> : (I) mutant generation and characterization                                   | 50        | 2014 |
| Optimization of biomass and fatty acid productivity of <i>Scenedesmus obliquus</i> as a promising microalga for biodiesel production                                            | 50        | 2013 |
| Superior triacylglycerol (TAG) accumulation in starchless mutants of <i>Scenedesmus obliquus</i> : (II) evaluation of TAG yield and productivity in controlled photobioreactors | 49        | 2014 |

**S12.** Bibliometric overview of the research on *Acutodesmus* sp. in 110 European scientific papers. Main concepts (a), concepts network (b), annual production (c), global collaborations (d), European collaborations (e), annual production by countries (f), main countries (g), main cities (h), emerging concepts (i), main journals (j) and main citations (k).





d.

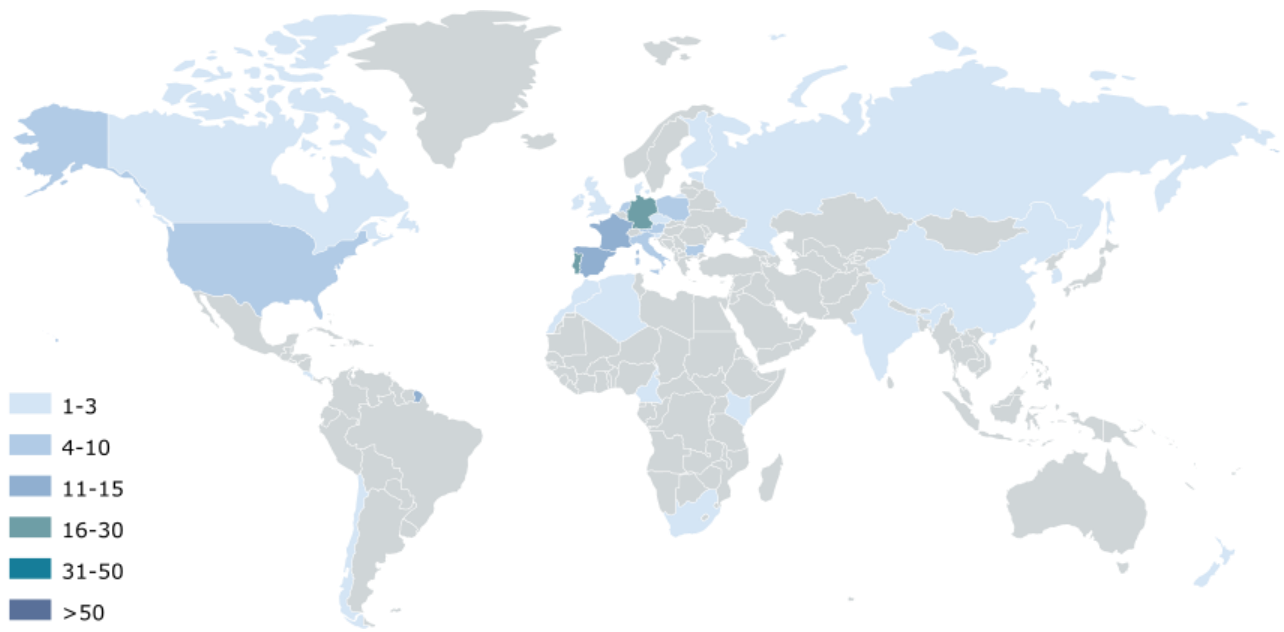

e.

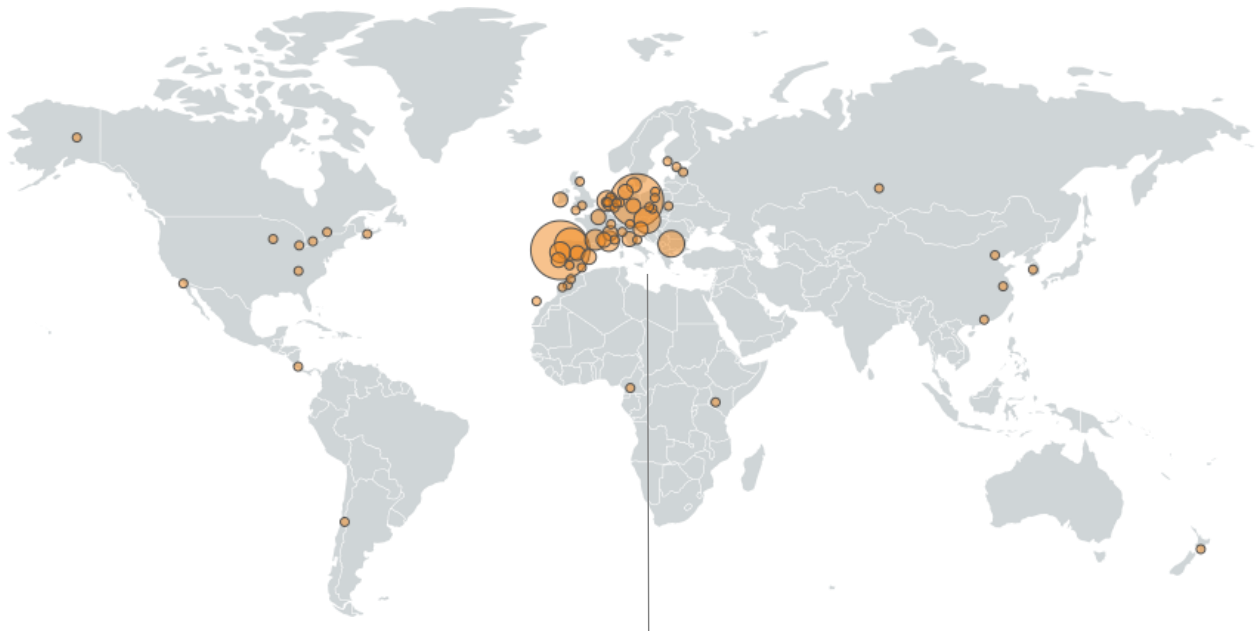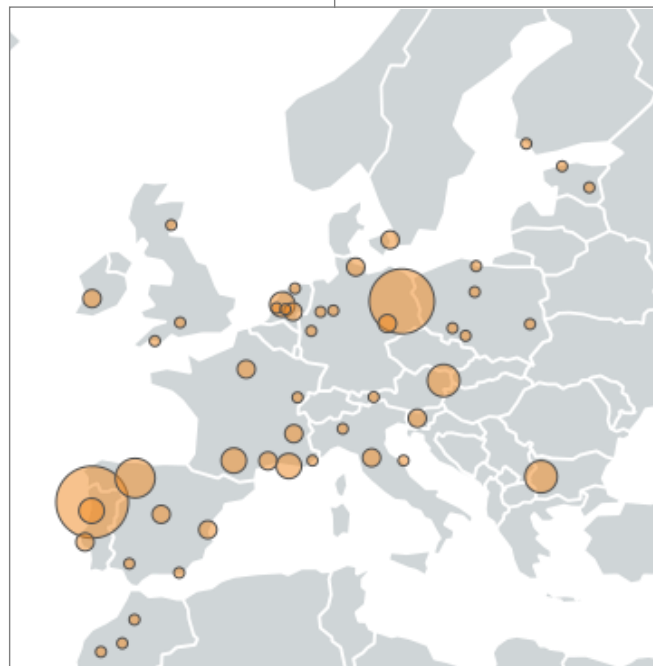

f.

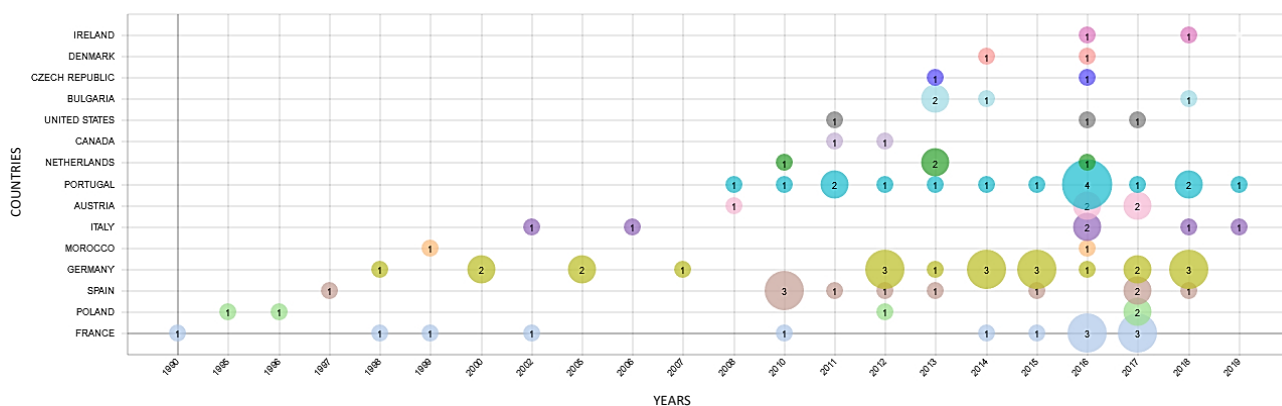

g.

| Countries      | Publications |
|----------------|--------------|
| GERMANY        | 22           |
| PORTUGAL       | 16           |
| FRANCE         | 13           |
| SPAIN          | 11           |
| ITALY          | 6            |
| AUSTRIA        | 5            |
| POLAND         | 5            |
| BULGARIA       | 4            |
| NETHERLANDS    | 4            |
| UNITED STATES  | 3            |
| CANADA         | 2            |
| CZECH REPUBLIC | 2            |
| DENMARK        | 2            |
| IRELAND        | 2            |
| MOROCCO        | 2            |

h.

| Cities     | Publications |
|------------|--------------|
| Porto      | 10           |
| Berlin     | 9            |
| Leon       | 5            |
| Sofia      | 4            |
| Vienna     | 4            |
| Amsterdam  | 3            |
| Aveiro     | 3            |
| Marseille  | 3            |
| Toulouse   | 3            |
| Copenhagen | 2            |
| Florence   | 2            |
| Grenoble   | 2            |
| Kiel       | 2            |
| Leipzig    | 2            |
| Limerick   | 2            |

i.

| Emerging concepts                | GF |
|----------------------------------|----|
| <i>Springer nature</i>           | 3  |
| <i>Highest value</i>             | 2  |
| <i>Pharmaceutical</i>            | 2  |
| <i>Production process</i>        | 2  |
| <i>Springer nature b</i>         | 2  |
| <i>Synthase</i>                  | 2  |
| <i>Technological</i>             | 2  |
| <i>Acclimation</i>               | 1  |
| <i>Acclimation process</i>       | 1  |
| <i>Acid phosphatase</i>          | 1  |
| <i>Acid phosphatase activity</i> | 1  |
| <i>Acting</i>                    | 1  |
| <i>Adaptation process</i>        | 1  |
| <i>Adhere</i>                    | 1  |
| <i>Adhesion</i>                  | 1  |
| <i>Adhesion assay</i>            | 1  |
| <i>Adsorbent</i>                 | 1  |
| <i>Adsorbent material</i>        | 1  |
| <i>Adsorption</i>                | 1  |
| <i>Adsorptive</i>                | 1  |

j.

| Journals and number of publications             | IF    | Publications |
|-------------------------------------------------|-------|--------------|
| JOURNAL OF APPLIED PHYCOLOGY                    | 2,635 | 5            |
| Algal Research-Biomass Biofuels and Bioproducts | 3,723 | 5            |
| BIORESOURCE TECHNOLOGY                          | 6,669 | 3            |
| APPLIED MICROBIOLOGY AND BIOTECHNOLOGY          | 3,67  | 2            |
| ENERGY CONVERSION AND MANAGEMENT                | 7,181 | 2            |
| HYDROBIOLOGIA                                   | 2,325 | 2            |
| INTERNATIONAL JOURNAL OF HYDROGEN ENERGY        | 4,084 | 2            |
| JOURNAL OF BIOTECHNOLOGY                        | 3,163 | 2            |
| Marine Drugs                                    | 3,772 | 2            |
| RSC Advances                                    | 3,049 | 2            |
| Water                                           | 2,524 | 2            |
| ENVIRONMENTAL MICROBIOLOGY                      | 5,147 | 1            |
| CURRENT OPINION IN BIOTECHNOLOGY                | 8,083 | 1            |
| CHEMOSPHERE                                     | 5,108 | 1            |
| BMC MICROBIOLOGY                                | 3,287 | 1            |

k.

| Title of publications                                                                                                                                             | Citations | Date |
|-------------------------------------------------------------------------------------------------------------------------------------------------------------------|-----------|------|
| Protein measurements of microalgal and cyanobacterial biomass                                                                                                     | 233       | 2010 |
| Screening for bioactive compounds from algae                                                                                                                      | 183       | 2010 |
| Potential of industrial biotechnology with cyanobacteria and eukaryotic microalgae                                                                                | 177       | 2013 |
| Determination of DPPH radical oxidation caused by methanolic extracts of some microalgal species by linear regression analysis of spectrophotometric measurements | 103       | 2007 |
| Auxiliary electron transport pathways in chloroplasts of microalgae                                                                                               | 99        | 2010 |
| Growth rate of four freshwater algae in relation to light and temperature                                                                                         | 80        | 1990 |
| Limiting steps of hydrogen production in <i>Chlamydomonas reinhardtii</i> and <i>Synechocystis</i> PCC 6803 as analysed by light-induced gas exchange transients  | 76        | 2002 |
| Parameterization of photosystem II photoinactivation and repair                                                                                                   | 70        | 2012 |
| The effect of light supply on microalgal growth, CO <sub>2</sub> uptake and nutrient removal from wastewater                                                      | 42        | 2014 |
| Phytoplankton community relationship to environmental variables in three Kenyan Rift Valley saline-alkaline lakes                                                 | 41        | 2008 |
| Elevated CO <sub>2</sub> concentrations affect the elemental stoichiometry and species composition of an experimental phytoplankton community                     | 40        | 2013 |
| Axenic cultivation of anoxygenic phototrophic bacteria, cyanobacteria, and microalgae in a new closed tubular glass photobioreactor                               | 38        | 2000 |
| Retene in pyrolysates of algal and bacterial organic matter                                                                                                       | 36        | 2000 |
| Transcriptomic response to prolonged ethanol production in the cyanobacterium <i>Synechocystis</i> sp. PCC6803                                                    | 35        | 2014 |
| Antibacterial and antifungal activities of selected microalgae and cyanobacteria                                                                                  | 33        | 2013 |

**S13.** Bibliometric overview of the research on *Synechocystis* sp. in 82 European scientific papers. Main concepts (a), concepts network (b), annual production (c), global collaborations (d), European collaborations (e), annual production by countries (f), main countries (g), main cities (h), emerging concepts (i), main journals (j) and main citations (k).



d.

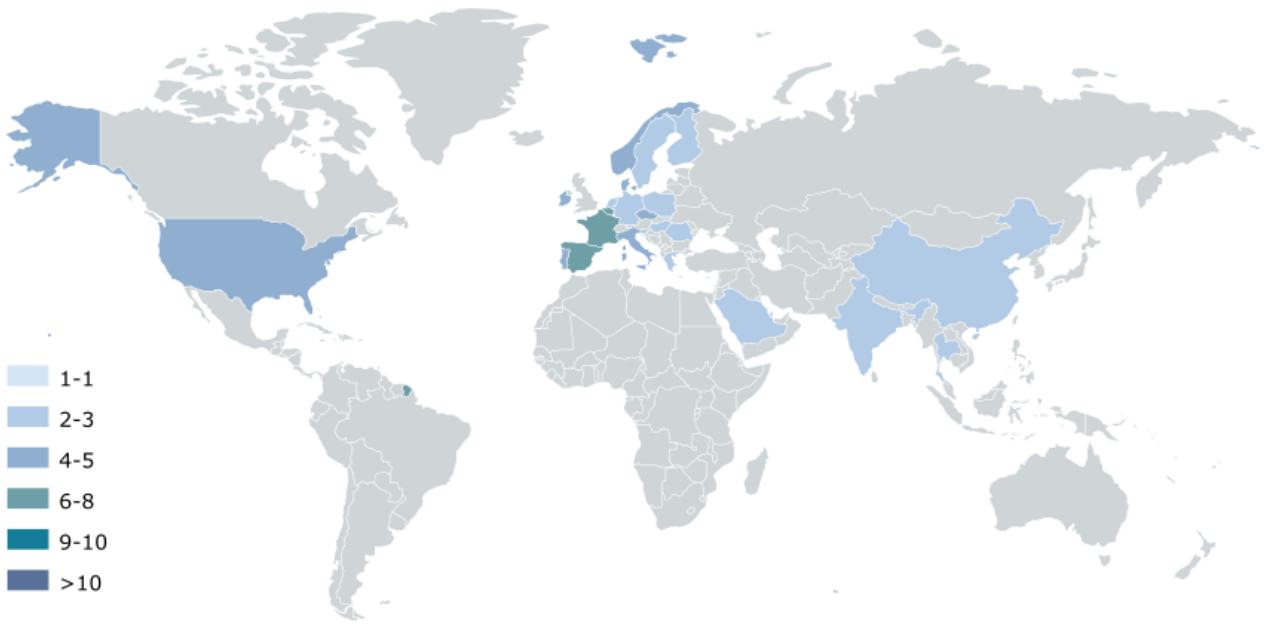

e.

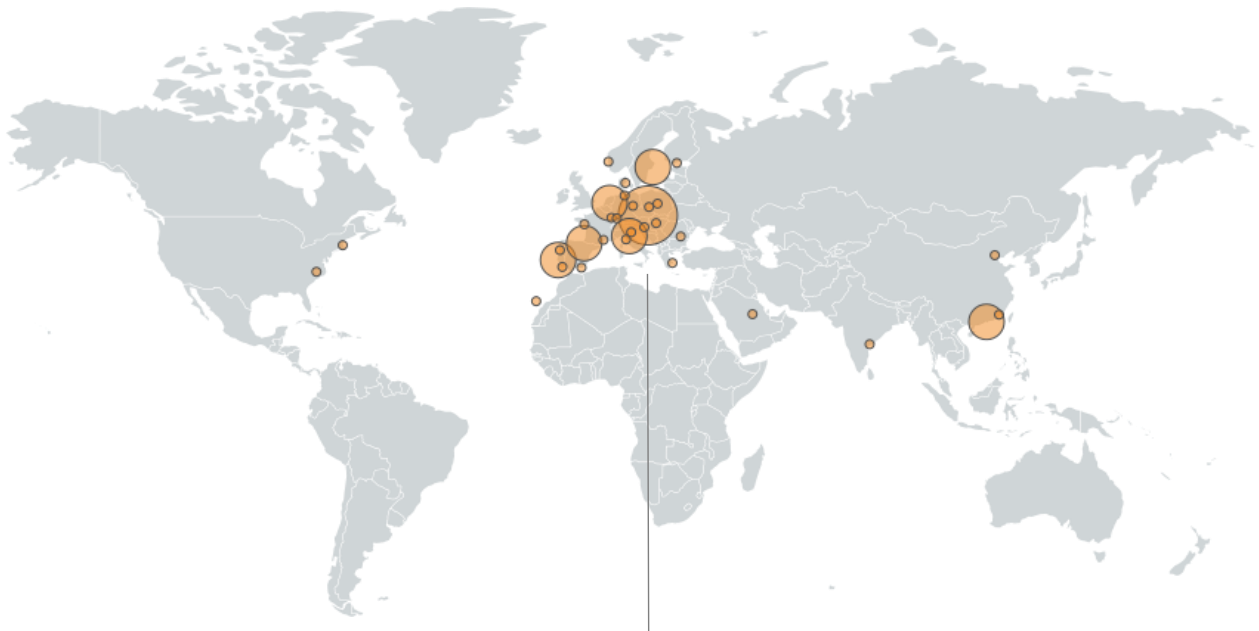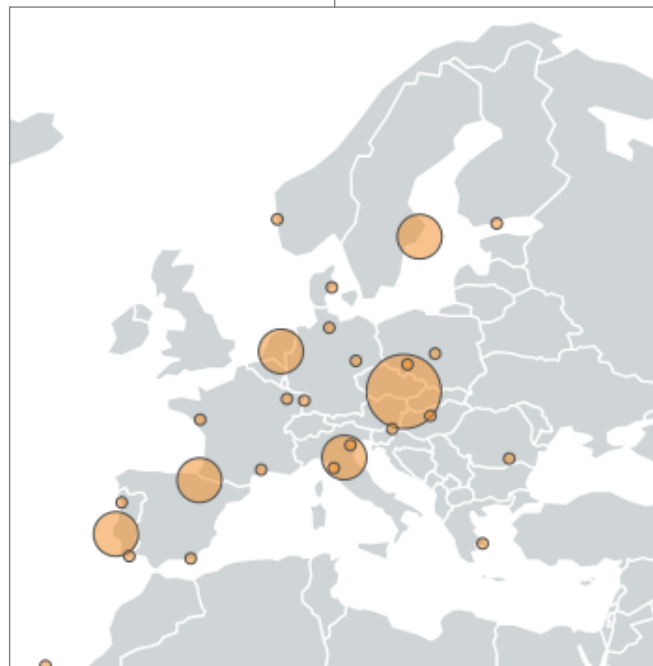

f.

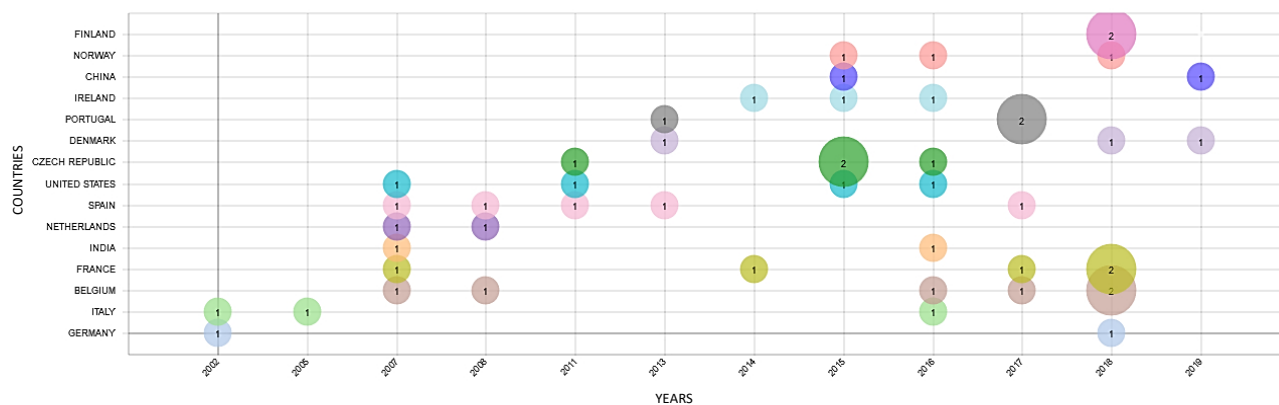

g.

| Countries      | Publications |
|----------------|--------------|
| BELGIUM        | 6            |
| FRANCE         | 5            |
| SPAIN          | 5            |
| CZECH REPUBLIC | 4            |
| UNITED STATES  | 4            |
| DENMARK        | 3            |
| IRELAND        | 3            |
| ITALY          | 3            |
| NORWAY         | 3            |
| PORTUGAL       | 3            |
| CHINA          | 2            |
| FINLAND        | 2            |
| GERMANY        | 2            |
| INDIA          | 2            |
| NETHERLANDS    | 2            |

h.

| Cities     | Publications |
|------------|--------------|
| Brno       | 3            |
| Bologna    | 2            |
| Lisbon     | 2            |
| Pampelune  | 2            |
| Shenzhen   | 2            |
| Stockholm  | 2            |
| Wageningen | 2            |
| Almeria    | 1            |
| Arhus      | 1            |
| Athens     | 1            |
| Beijing    | 1            |
| Bergen     | 1            |
| Boston     | 1            |
| Bucharest  | 1            |
| Budapest   | 1            |

i.

| Emerging concepts               | GF |
|---------------------------------|----|
| <i>Bioactive</i>                | 2  |
| <i>Chemical</i>                 | 2  |
| <i>Concentrate</i>              | 2  |
| <i>Consume</i>                  | 2  |
| <i>Enzymatic</i>                | 2  |
| <i>Food application</i>         | 2  |
| <i>Glycerol</i>                 | 2  |
| <i>Limacinum</i>                | 2  |
| <i>Microalgal oil</i>           | 2  |
| <i>N 6 pufa</i>                 | 2  |
| <i>Nmr</i>                      | 2  |
| <i>Phaeodactylum</i>            | 2  |
| <i>Porphyridium</i>             | 2  |
| <i>Pure</i>                     | 2  |
| <i>Rapeseed</i>                 | 2  |
| <i>Rapeseed oil</i>             | 2  |
| <i>Regardless</i>               | 2  |
| <i>Rm</i>                       | 2  |
| <i>Ruminant</i>                 | 2  |
| <i>Schizochytrium limacinum</i> | 2  |

j.

| Journals and number of publications               | IF    | Publications |
|---------------------------------------------------|-------|--------------|
| EUROPEAN JOURNAL OF LIPID SCIENCE AND TECHNOLOGY  | 1,852 | 4            |
| Algal Research-Biomass Biofuels and Bioproducts   | 3,723 | 3            |
| AQUACULTURE                                       | 3,022 | 2            |
| Livestock Science                                 | 1,376 | 2            |
| FOOD CHEMISTRY                                    | 5,399 | 2            |
| JOURNAL OF ANIMAL PHYSIOLOGY AND ANIMAL NUTRITION | 1,703 | 2            |
| Progress in Nutrition                             | 0,265 | 2            |
| Microbial Cell Factories                          | 4,402 | 1            |
| MEAT SCIENCE                                      | 3,483 | 1            |
| Marine Drugs                                      | 3,772 | 1            |
| FOOD AND CHEMICAL TOXICOLOGY                      | 3,775 | 1            |
| JOURNAL OF SUPERCRITICAL FLUIDS                   | 3,481 | 1            |
| JOURNAL OF POLYMERS AND THE ENVIRONMENT           | 2,765 | 1            |
| JOURNAL OF DAIRY SCIENCE                          | 3,082 | 1            |
| ENERGY CONVERSION AND MANAGEMENT                  | 7,181 | 1            |

k.

| Title of publications                                                                                                                                                                                     | Citations | Date |
|-----------------------------------------------------------------------------------------------------------------------------------------------------------------------------------------------------------|-----------|------|
| Omega-3 fatty acids for nutrition and medicine: Considering microalgae oil as a vegetarian source of EPA and DHA                                                                                          | 85        | 2007 |
| Alternative sources of n-3 long-chain polyunsaturated fatty acids in marine microalgae                                                                                                                    | 82        | 2013 |
| Effect of dietary starch or micro algae supplementation on rumen fermentation and milk fatty acid composition of dairy cows                                                                               | 80        | 2008 |
| <i>Cryptocodinium cohnii</i> and <i>Schizochytrium</i> sp. as potential substitutes to fisheries-derived oils from seabream ( <i>Sparus aurata</i> ) microdiets                                           | 70        | 2008 |
| Development of dry fermented sausages rich in docosahexaenoic acid with oil from the microalgae <i>Schizochytrium</i> sp.: Influence on nutritional properties, sensorial quality and oxidation stability | 53        | 2007 |
| Changes in rumen biohydrogenation intermediates and ciliate protozoa diversity after algae supplementation to dairy cattle                                                                                | 44        | 2007 |
| Biological potential of microalgae in China for biorefinery-based production of biofuels and high value compounds                                                                                         | 28        | 2015 |
| A comparative study on the effect of algal and fish oil on viability and cell proliferation of Caco-2 cells                                                                                               | 26        | 2007 |
| Metabolism, health and fillet nutritional quality in Atlantic salmon ( <i>Salmo salar</i> ) fed diets containing n-3-rich microalgae                                                                      | 26        | 2015 |
| Microalgae and organic minerals enhance lipid retention efficiency and fillet quality in Atlantic salmon ( <i>Salmo salar</i> L.)                                                                         | 23        | 2016 |
| Seaweed lipids as nutraceuticals                                                                                                                                                                          | 23        | 2011 |
| Supercritical fluid extraction from microalgae with high content of LC-PUFAs. A case of study: Sc-CO <sub>2</sub> oil extraction from <i>Schizochytrium</i> sp                                            | 16        | 2016 |
| Microalgae as feed ingredients for livestock production and meat quality: A review                                                                                                                        | 15        | 2017 |
| Manipulation of fatty acid and antioxidant profiles of the microalgae <i>Schizochytrium</i> sp. through flaxseed oil supplementation                                                                      | 10        | 2014 |
| Docosahexaenoic acid in the treatment of rheumatoid arthritis: A double-blind, placebo-controlled, randomized cross-over study with microalgae vs. sunflower oil                                          | 8         | 2018 |

**S14.** Bibliometric overview of the research on *Schizochytrium* sp. in 43 European scientific papers. Main concepts (a), concepts network (b), annual production (c), global collaborations (d), European collaborations (e), annual production by countries (f), main countries (g), main cities (h), emerging concepts (i), main journals (j) and main citations (k).
